1  
2  
3  
4  
5  
6  
7  
8  
9  
10  
11  
12  
13  
14

# **HIV-1 requires capsid remodelling at the nuclear pore for nuclear entry and integration**

Anabel Guedán<sup>1\*</sup>, Callum D Donaldson<sup>1\*</sup>, Ophélie Cosnefroy<sup>1</sup>, Ian A Taylor<sup>2</sup>, Kate N Bishop<sup>1</sup>

<sup>1</sup> Retroviral Replication Laboratory, The Francis Crick Institute, London, United Kingdom

<sup>2</sup> Macromolecular Structure Laboratory, The Francis Crick Institute, London, United Kingdom

\* These authors contributed equally

15 **ABSTRACT**

16

17 The capsid (CA) lattice of the HIV-1 core plays a key role during infection. From the moment the  
18 core is released into the cytoplasm, it interacts with a range of cellular factors that, ultimately,  
19 direct the pre-integration complex to the integration site. For integration to occur, the CA lattice  
20 must disassemble. Early uncoating or a failure to do so has detrimental effects on virus infectivity,  
21 indicating that an optimal stability of the viral core is crucial for infection. Here, we introduced  
22 cysteine residues into HIV-1 CA in order to induce disulphide bond formation and engineer hyper-  
23 stable mutants that are slower or unable to uncoat, and then followed their replication. From a  
24 panel of mutants, we identified three with increased capsid stability in cells and found that, whilst  
25 the M68C/E212C mutant had a 5-fold reduction in reverse transcription, two mutants,  
26 A14C/E45C and E180C, were able to reverse transcribe to approximately WT levels. Moreover,  
27 these mutants only had a 5-fold reduction in 2-LTR circle production, suggesting that not only  
28 could reverse transcription complete in hyper-stable cores, but that the nascent viral cDNA could  
29 enter the nuclear compartment. Furthermore, we observed significant levels of A14C/E45C  
30 mutant capsid in nuclear and chromatin-associated fractions implying that the hyper-stable cores  
31 themselves entered the nucleus. Immunofluorescence studies revealed that although the  
32 A14C/E45C mutant capsid reached the nuclear pore with the same kinetics as wild type capsid, it  
33 was then retained at the pore in association with Nup153. Crucially, infection with the hyper-  
34 stable mutants did not promote CPSF6 re-localisation to nuclear speckles, despite the mutant  
35 capsids being competent for CPSF6 binding. These observations suggest that hyper-stable cores  
36 are not able to uncoat, or remodel, enough to pass through or dissociate from the nuclear pore

37 and integrate successfully. This, in turn, highlights the importance of capsid lattice flexibility for  
38 nuclear entry. In conclusion, we hypothesise that during a productive infection, a capsid  
39 remodelling step takes place at the nuclear pore that releases the core complex from Nup153,  
40 and relays it to CPSF6, which then localises it to chromatin ready for integration.

41

## 42 **AUTHOR SUMMARY**

43

44 The mature viral core of human immunodeficiency virus (HIV) consists of a highly organised  
45 lattice formed by capsid molecules that encloses the viral RNA and viral enzymes. This lattice is  
46 crucial during the early stages of viral replication, as it has to break down – uncoat – at the right  
47 time and place in order for the viral DNA to integrate successfully. Lentiviruses, like HIV, can infect  
48 non-dividing cells and are able to access the host cell DNA by entering the nucleus through  
49 nuclear pores. Until recently, uncoating was thought to occur in the cytoplasm as the whole core  
50 was thought too large to pass through the nuclear pore. However, lately it has been suggested  
51 that uncoating might occur at the nuclear pore or even inside the nucleus and the site of  
52 uncoating is currently hotly debated. By investigating HIV mutants with an increased lattice  
53 stability, we have shown that lattice flexibility is crucial for nuclear entry. Provocatively, we  
54 observed hyper-stable mutant capsid in nuclear and chromatin-associated fractions suggesting  
55 that uncoating is not required for nuclear entry. Nonetheless, microscopy experiments suggested  
56 that these hyper-stable mutants were retained on the inner side of the nuclear pore, and were  
57 impaired for downstream events in the nucleus, leading to a severe infectivity defect. Therefore,  
58 we believe that an essential uncoating, or capsid lattice remodelling event normally takes place  
59 at the nuclear pore.

60

## 61 INTRODUCTION

62

63 Upon infection of the target cell, the human immunodeficiency virus 1 (HIV-1) core is released  
64 into the cytoplasm before trafficking to the nucleus. During this process, the viral RNA genome is  
65 reverse transcribed by the viral reverse transcriptase (RT) into double-stranded DNA forming  
66 what is known as the reverse transcription complex (RTC). Inside the nucleus, the viral DNA is the  
67 main component of the pre-integration complex (PIC) and is integrated by the viral integrase (IN)  
68 into the host cell genome to form a provirus [1].

69

70 The mature core of HIV-1 consists of a highly organised lattice of capsid (CA) molecules, encasing  
71 the viral RNA genome and associated viral proteins. The lattice is composed of approximately  
72 1500 CA monomers assembled into about 250 hexamers and exactly 12 pentamers, forming a  
73 fullerene cone shape [2-5]. The CA monomer is a largely helical protein with two independent  
74 folded domains separated by a flexible linker: the N-terminal domain (NTD) and the C-terminal  
75 domain (CTD) [2, 6-8]. Structural studies have provided key information on how the CA lattice is  
76 organised [8-14]. Intra-hexamer and inter-hexamer interactions at different lattice interfaces  
77 contribute to an optimal CA lattice stability. The intra-hexamer interactions include NTD-NTD and  
78 NTD-CTD interactions between adjacent CA monomers within a hexamer, whereas the inter-  
79 hexamer interactions include dimeric and trimeric CTD-CTD interactions between neighbouring  
80 hexamers [11, 14].

81

82 As the outer surface of the viral core, the CA lattice protects the viral DNA from cytosolic sensors  
83 [15, 16] but it can be recognised by cellular restriction factors that inhibit viral replication [17,  
84 18]. Moreover, from cell entry to integration, the CA lattice interacts with many cellular factors.  
85 Some of these are cytoplasmic, including Cyclophilin A (CypA) [19-21], the cellular motors dynein  
86 and kinesin-1 [1, 22, 23] and FEZ1 [24]. Others shuttle between the cytoplasm and the nucleus  
87 like Transportin-3 (TNPO3) [25-27] and Transportin-1 [28]. There are further interactions at the  
88 nuclear envelope with nuclear pore complex (NPC) proteins, particularly nucleoporins 358  
89 (Nup358) and 153 (Nup153) [25, 26, 29-31] and with nuclear proteins such as cleavage and  
90 polyadenylation factor 6 (CPSF6); [31-35]. The roles of most of these cellular factors in viral  
91 replication are not yet fully understood.

92

93 Prior to integration, the CA lattice is assumed to disassemble in a process termed uncoating;  
94 however, the timing, location and even the exact definition of this process remains unclear. For  
95 many years, uncoating was believed to occur immediately after viral entry [36, 37] but, more  
96 recently, data has suggested that it might occur after a short time in the cytoplasm, at the nuclear  
97 pore or even, most recently, inside the nucleus [38-44]. Indeed, there is growing evidence to  
98 suggest that at least some CA is present in the nucleus, although its oligomeric state and function  
99 have yet to be fully characterised [34, 40-43, 45-48]. For this reason, using the term “remodelling”  
100 may be more appropriate than uncoating to suggest changes in the CA lattice. We, and others,  
101 have also reported a link between CA loss and reverse transcription [38, 49-51]. Uncoating is  
102 inhibited if reverse transcription is stalled. Initially, this was taken as evidence for cytoplasmic  
103 uncoating [49]. However, when combined with emerging data suggesting CA can reach the

104 nucleus more rapidly than previously thought [43, 44, 48], it has reopened the debate about  
105 where reverse transcription is actually completed during infection, and so does not currently  
106 preclude any specific uncoating model.

107

108 Importantly, the location and timing of uncoating together with optimal stability of the CA lattice  
109 seem to be key to successful infection. Early uncoating, or a failure to uncoat, both have  
110 detrimental effects on viral infectivity [15, 52, 53], making the CA lattice an attractive target for  
111 drug development [54, 55]. Here we set out to investigate the effects of increased core stability  
112 on the early stages of HIV-1 infection. To this end, we introduced mutations into CA predicted to  
113 stabilise the mature CA lattice at different interfaces. We show that mutations that create a  
114 hyper-stable lattice reduce virus infectivity by inhibiting integration, but only slightly impede  
115 reverse transcription. Analysis of CA protein levels within different subcellular fractions during  
116 infection revealed higher levels of hyper-stable mutant CA in all fractions over time, including in  
117 the nucleus. Finally, immunofluorescence data suggest that the hyper-stable mutant CA lattice is  
118 retained around the nuclear pore and that it is unable to promote CPSF6 re-localisation to nuclear  
119 speckles. Based upon these observations, we propose a model where hyper-stable mutants are  
120 unable to uncoat or “remodel” their capsid lattice to the required extent to successfully deliver  
121 the viral DNA for integration into the host cell genome.

122

123

## 124 **RESULTS**

125

126 **Cysteine mutations at different CA lattice interfaces are able to stabilise the viral core in cells.**

127

128 Previous *in vitro* studies introduced cysteine mutations at the CA NTD-NTD interface to create  
129 disulphide bridges in order to stabilise CA hexamers for crystallisation [11, 12]. We decided to  
130 use the same approach to examine if similar mutations would increase the stability of the CA  
131 lattice during infection of cells, to investigate the effect of core stability on the early stages of  
132 HIV-1 infection. We selected CA mutants from the literature and identified additional CA residues  
133 to substitute with cysteine residues in order to stabilise all of the different inter-hexamer  
134 interfaces with disulphide bridges (listed in Fig 1A and residues highlighted in Fig 1B). The new  
135 mutants E180C, L151C/L189C and K203C/A217C were designed based on a previous report  
136 demonstrating that disulphide bonds can have a variable C $\beta$ -C $\beta$  inter-residue spacing of between  
137 3.5-4.5Å [56]. Thus, employing a cryo-EM MDFF atomic model of an *in vitro* CA tubular assembly  
138 [PDB ID: 3J34; [8]] and crystal structures [PDB ID: 3H4E and 3H47; [11]], we selected residue pairs  
139 with a C $\beta$ -C $\beta$  distance within this range at the various interfaces for site-directed mutagenesis.  
140 Consequently, we created a panel with at least two mutants at each CA lattice interface. In  
141 addition, the P38A mutant was included in the panel as a negative control, as it has shown to be  
142 less stable than WT [51, 52]. The original mutant used to determine the crystal structure of a  
143 hexameric CA assembly, A14C/E45C/W184A/M185A, [11, 12] was also included as a negative  
144 control.

145

146 Firstly, we synthesised viral-like particles (VLP) expressing the different CA mutants and a GFP  
147 reporter gene. We assessed VLP production by measuring the RT activity in the supernatants of



148 producer 293T cells using a modified RT ELISA. As expected, the A14C/E45C/W184A/M185A and  
149 W184A/M185A mutants that weaken CTD-CTD interactions were severely impaired for virus  
150 production (Supplementary Fig 1A). We confirmed that this was not due to a lack of Gag  
151 expression of these mutants, by immunoblotting 293T producer cell lysates with an anti-HIV-1  
152 CA antibody and showing that the level of Gag expression in the mutants was similar to WT  
153 (Supplementary Fig 1B). Most of the mutants, however, showed similar titres to WT VLP, implying  
154 that these mutations did not affect Gag assembly. Of note, the inter-hexamer mutants V181C,  
155 L151C/L189C and K203C/A217C were partially impaired for VLP production (Supplementary Fig  
156 1A), likely due to the importance of this interface on virus assembly [3, 53]. Whilst we confirmed  
157 that expression of these mutant capsid proteins in 293T producer cell lysates was similar to WT  
158 VLP (Supplementary Fig 1C), we detected an additional, smaller, CA band for both L151C/L169C  
159 and K203/A217C. This has been reported previously [12, 57] and probably represents a  
160 processing defect, such as inappropriate cleavage of CA by the viral protease due to the structural  
161 changes [57]. This may be the cause of the reduced viral titres. Thus, based on these results, the  
162 L151C/L189C and the K203C/A217C mutants as well as the A14C/E45C/W184A/M185A and  
163 W184A/M185A mutants were not included in further experiments.

164  
165 Next, we performed fate-of-capsid assays, to study the effect of the cysteine mutations on viral  
166 core stability in cells (Fig 2). HeLa cells were infected with equal titres of WT and mutant VLP, and  
167 cell lysates were harvested at 2 and 20 hours post-infection (hpi). These time points were  
168 selected as they have previously been used to monitor the stability of the viral core at the early  
169 and late stages of the virus replication cycle [17]. The cell lysates were centrifuged through a

170 sucrose cushion to be separated into two fractions: free or soluble CA (S) and pelleted CA (P),  
171 which contains assembled cores [58]. An input (I) sample was also harvested before  
172 centrifugation through the sucrose cushion. The fractions were analysed by immunoblotting with  
173 an anti-HIV-1 CA antibody and the ratio of soluble to pelleted CA was determined. Fig 2 shows  
174 representative blots of the fate-of-capsid assay for each mutant. A WT sample was included in  
175 every assay for comparison. Although there was some variation between assays, the WT samples  
176 showed similar amounts of CA in the pellet and soluble fractions (P=S) at 2 hpi and less CA in the  
177 pellet (P<S) at 20hpi (Fig 2A), presumably reflecting a reduction in the amount of assembled CA  
178 with time due to uncoating. In agreement with previous reports, we recovered much less CA in  
179 the pellet fraction than the supernatant fraction from cells infected with the negative hypo-stable  
180 control, P38A, [51, 52]. For this mutant, P<S at both 2 and 20 hpi, indicating the small amount of  
181 assembled CA at both time points. Therefore, we set a CA ratiometric profile criteria for mutants  
182 to be considered hyper-stable as the following: Mutants should consistently show greater  
183 amounts of CA in the pellet than in the supernatant (P>S) at 2 hpi and at least equal amounts in  
184 both fractions (P=S) at 20 hpi. Three mutants showed this phenotype: M68C/E212C, A14C/E45C  
185 and E180C (highlighted with dashed boxes in Fig 2A). The profile of P207C/T216C and the V181C  
186 mutants was similar to WT (Fig 2A). At 2 hpi, A42C/T54C showed a CA ratio P=S and, Q63C/Y169C  
187 and A204C showed P<S, suggesting that none of these mutants had increased viral core stability  
188 compared to WT. Thus, taken together despite the cytoplasm being a reducing environment [59,  
189 60], these data showed that three of the panel of cysteine mutants had increased core stability  
190 in cells and could be used to study the effects on replication of stabilizing the viral core.

191

192 **Most CA mutants are less infectious, regardless of CA lattice stability.**

193

194 To investigate the effect of the CA mutations on virus infectivity, we infected four cell lines (293T,  
195 HeLa, SupT1 and U937 cells) with equal RT units of VSVg-pseudo-typed GFP-reporter WT or  
196 mutant VLP and analysed the percentage of GFP+ cells at 72 hpi by flow cytometry (Fig 3). As  
197 observed previously, the P38A mutant that had reduced CA lattice stability had a marked  
198 reduction in GFP expression in all the cell lines (Fig 3, grey bars). Apart from the inter-hexamer  
199 P207C/T216C mutant that showed similar infectivity to WT, the remainder of the mutants also  
200 showed decreased infectivity, ranging from ~0.05-10% of WT infectivity. A similar pattern of  
201 infectivity was seen across all the cells lines indicating that there were no cell-type specific  
202 effects, with generally lower overall infectivity in U937 cells. Interestingly, the level of infectivity  
203 did not correlate with the CA lattice stability determined by the fate-of-CA assay (Fig 2) but there  
204 was some correlation with the CA interface modified (see colour coding Fig 1A and Fig 3), with  
205 the intra-hexamer mutants (blue and orange bars) being more defective than the inter-hexamer  
206 mutants (green and red bars). Of the three hyper-stable mutants, A14C/E45C, M68C/E212C and  
207 E180C (Fig 3, black arrowheads), the infectivity ranged from 0.7- 4%, 0.07-0.4% and 2-10%  
208 respectively between the different cell lines.

209

210 **Reverse transcription can complete in hyper-stable cores but infectivity is severely inhibited.**

211

212 Next, to determine which step in replication was affected by the CA mutations, we examined the  
213 ability of each mutant to reverse transcribe (Fig 4). 293T cells were synchronously infected with

214 equal RT units of WT or mutant VLP, and at 0, 1, 2, 4, 6 and 24 hpi, cells were harvested and the  
215 DNA extracted and analysed for early (strong stop) and late (second strand) viral cDNA products  
216 by qPCR (Fig 4). Following infection with WT VLP, the amount of viral cDNA products increased  
217 with time, peaking at 6 hpi (Fig 4A-D, black line). As seen before, infection with mutant P38A  
218 resulted in less accumulation of viral cDNA (Fig 4A, grey lines). This ~90% decrease in cDNA  
219 accumulation mirrored the 90% decrease in infectivity (Fig 3). Likewise, the P207C/T216C mutant  
220 had similar infectivity to WT VLP and had similar levels of reverse transcription (Fig 4B, red lines).  
221 However, the hyper-stable mutants A14C/E45C and M68C/E212C had a different phenotype.  
222 Surprisingly, despite a ~95% decrease in infectivity, A14C/E45C reverse transcribed to WT levels  
223 (Fig 4C, blue lines) and mutant M68C/E212C still produced about 10% the cDNA of WT (Fig 4D,  
224 orange lines), even though its infectivity was reduced to less than 1% (Fig 3). Figures 4E and 4F  
225 show a summary of the amount of strong stop cDNA accumulated at 6 and 24 hpi, respectively,  
226 for all the mutants. The E180C and V181C mutants showed WT levels of strong stop cDNA, A204C  
227 accumulated about 10% the cDNA of WT and A42C/T54C and Q63C/Y169C only accumulated ~1%  
228 the cDNA of WT. Similar results were obtained when looking at the levels of second strand cDNA  
229 (Fig S2A). In general, the level of cDNA accumulation at 24 hours compared to WT correlated with  
230 relative level of infectivity compared to WT (Fig 4G and Fig S2B). Plotting these data as a ratio of  
231 relative cDNA levels to relative infectivity shows that most mutants have a ratio of less than 3  
232 (Fig 4H and Fig S2C). Therefore, it can be assumed that, in general, the reduction in infectivity  
233 results from the effect on reverse transcription. The only mutants where the level of reverse  
234 transcription products did not correlate with the level of infectivity was for the three hyper-stable  
235 mutants (Fig 4H and Fig S2C). These data suggest that even though increasing core stability has

236 detrimental effects on infectivity, the block is after reverse transcription. This implies that the  
237 core does not need to uncoat in order to reverse transcribe. Therefore, although reverse  
238 transcription promotes uncoating of WT virus [38, 49-51, 61], reverse transcription is not  
239 dependant on uncoating.

240

241 We therefore decided to focus on the A14C/E45C, E180C and M68C/E212C mutants to  
242 investigate the effect of core stability on the other early replication steps. First, we examined  
243 whether the observed increase in core stability of these mutants was indeed due to disulphide  
244 bridge formation as designed, and not due to other stabilising effects of the individual mutations.  
245 HeLa cells were infected with equal RT units of WT and mutant VLP and cell lysates were analysed  
246 by SDS-PAGE in reducing or non-reducing conditions followed by immunoblotting with an anti-  
247 HIV-1 CA antibody (Fig 5A). Samples were either treated with iodoacetamide to prevent  
248 artefactual cysteine formation (non-reducing conditions), or dithiothreitol (DTT) to reduce  
249 disulphide bonds (reducing conditions) prior to SDS-PAGE. Only monomeric CA of 24KDa was  
250 detected for WT VLP, in both reducing and non-reducing conditions. By contrast, disulphide  
251 cross-linking of CA monomers was detected in the non-reducing conditions for all three hyper-  
252 stable mutants. A strong band was evident at 48 kDa, which corresponds to a CA dimer, and  
253 slower migrating species were also present, suggesting higher order oligomers existed. Upon  
254 addition of DTT, the higher molecular weight bands disappeared, suggesting that intra- or inter-  
255 hexamer disulphide bonds contribute to the increased core stability of these mutants.

256

257 To further investigate the infectivity block to the hyper-stable mutants, we measured the ability  
258 of the mutants to complete different steps of replication between reverse transcription and  
259 integration. Following synchronous infection of 293T cells with equal RT units of WT or mutant  
260 VLP, samples were taken at 6 hpi, 24 hpi and two weeks post infection, and levels of early and  
261 late cDNA, 2-LTR circles and integrated viral DNA were quantified by qPCR. It is widely accepted  
262 that 2-LTR circles are an indicator of completion of reverse transcription and nuclear entry. Fig  
263 5B shows the relative amounts of the different viral DNA products compared to WT VLP.  
264 Interestingly, as well as being only slightly defective for reverse transcription, both A14C/E45C  
265 and E180C mutant VLP were able to produce 2-LTR circles at ~20% the amount of 2-LTR circles  
266 produced by WT VLP. This suggests that at least some of these mutant particles can enter the  
267 nucleus. Importantly, these mutants integrated <2% of the amount of cDNA integrated in WT  
268 infections, which correlated well with the decrease in infectivity measured. Therefore, there  
269 appears to be a minor block to nuclear entry for these two mutants, but, surprisingly, the major  
270 defect is after nuclear entry and before integration. In contrast, mutant M68C/E212C VLP only  
271 produced 10% of the cDNA of WT, and there was a further reduction in the amount of 2-LTR  
272 circles, to <1% of that produced by WT VLP. There was no further decrease in integration  
273 compared to the levels of 2-LTR circles, suggesting that the M68C/E212C mutant is more severely  
274 impaired earlier in replication than the other two hyper-stable mutants and is blocked for nuclear  
275 entry. Altogether, these data suggests that reverse transcription can finish in a hyper-stable core  
276 and that this cDNA is able to enter the nuclear compartment, but that there is a block to  
277 integration that prevents these hyper-stable mutants successfully forming proviruses.

278

279 **CA protein from the A14C/E45C mutant is detected in nuclear and chromatin fractions.**

280

281 The nuclear pore has generally been considered too small to allow passage of a complete HIV  
282 core, and yet we have shown here that hyper-stable CA mutants can synthesise cDNA and that  
283 at least some of this cDNA can reach the nucleus to form 2-LTR circles. This suggests that either  
284 the cDNA can escape the core in order to enter the nucleus, despite the lattice being more  
285 resistant to disassembly, or that the whole stable lattice can enter the nucleus. Therefore, in  
286 order to determine the cellular localisation of components of a hyper-stable core, we measured  
287 CA and IN protein levels in different cellular compartments during infection (Fig 6). HeLa cells  
288 were synchronously infected with equal RT units of WT or A14C/E45C VLP and cells were  
289 harvested at 4, 8, 24 and 30 hpi. The total levels of both CA and IN in whole cell lysates were  
290 similar for WT and A14C/E45C (CC) infection at all time points, both decreasing between 8 and  
291 24 hpi (Fig 6A). The infected cell lysates were next processed into the following subcellular  
292 fractions: cytoplasm, membranes, nucleus and chromatin-bound. The separation resolution of  
293 the subcellular fractionation was determined by looking for distinct markers in the different  
294 fractions: HSP90 for the cytoplasm, Calnexin for the membranes, HDAC2 for the nucleus and  
295 Histone H3 for chromatin-bound. The representative immunoblot in Fig 6B shows that the  
296 fractionation procedure was highly effective, and the markers were predominantly found in the  
297 expected fractions. We also probed for Tubulin- $\alpha$  and Lamin B1 to monitor the distribution of the  
298 cytoskeleton and the nuclear envelope, respectively. Tubulin- $\alpha$  was highly enriched in the  
299 cytoplasmic fraction while Lamin B1 was mainly localised in the nuclear fraction and a small  
300 portion seemed to be chromatin-bound. Furthermore, we confirmed that CPSF6 is mainly found

301 in the soluble nuclear fraction. Having determined that the cellular compartments had been  
302 separated successfully, we analysed CA and IN protein levels in the different subcellular fractions  
303 by immunoblotting with anti-HIV-1 CA and anti-HIV-1 IN antibodies. The amount of CA in the  
304 cytoplasm remained relatively constant throughout the course of the infection (Fig 6C), with  
305 noticeably more CA detected following infection with A14C/E45C VLP, especially at 8 and 24 hpi.  
306 Conversely, IN levels decreased markedly between 8 and 24 hpi, but there was little difference  
307 between WT and A14C/E45C infections (Fig 6C). A similar pattern was observed in the membrane  
308 fraction (Fig 6D). This confirms the increased stability of the A14C/E45C CA lattice compared to  
309 WT CA, and suggests that IN protein has a shorter half-life than CA. Surprisingly, we detected  
310 both CA and IN in nuclear fractions as early as 4 hpi (Fig 6E). Particularly surprising was the  
311 amount of A14C/E45C CA detected. Also unexpected was that more CA and IN were detected in  
312 the nucleus at the earlier time points than at 24 hours. This suggested that viral cores travel to  
313 the nucleus faster than previously thought, and before the peak of reverse transcription at 6 hpi  
314 (see Fig 4). Other groups have also recently reported this phenomenon [39, 40, 43, 44, 48].  
315 Finally, we observed a similar, but more extreme, pattern of detection of CA in the chromatin  
316 fractions (Fig 6F). Here we observed significantly more A14C/E45C CA than WT CA present at all  
317 time points, and, again, A14C/E45C CA was present even at 4 hpi. Interestingly, there was more  
318 IN present in this fraction from the WT infections than the A14C/E45C infections at all time  
319 points. The association of A14C/E45C CA with nuclear fractions, particularly with the chromatin-  
320 bound fraction, suggests that, despite being hyper-stable, this CA protein could enter the  
321 nucleus. However, as the nuclear envelope marker, Lamin B1, was also distributed in these two  
322 fractions, it could also be hypothesised that A14C/E45C was accumulating at the nuclear



323 envelope rather than inside the nucleus. To help resolve these options, we performed cellular  
324 localisation experiments.

325

326 **The A14C/E45C mutant is impeded at nuclear entry.**

327

328 In order to investigate nuclear entry of the A14C/E45C mutant further, we monitored the  
329 interactions between CA and the nuclear pore proteins Nup358 and Nup153 during infection.  
330 These proteins are part of the nuclear pore complex (NPC) where Nup358 faces the cytoplasm  
331 and Nup153 forms part of the nuclear basket of the NPC, facing the nucleus. Furthermore, both  
332 proteins have previously been described to bind HIV-1 CA directly and to be involved in HIV-1  
333 replication [25, 26, 30]. HeLa cells were synchronously infected with equal RT units of WT or  
334 A14C/E45C VLP for 2, 4, 6, 8 and 10 hpi. At each time point, cells were fixed, and proximity ligation  
335 assays (PLA) were performed with specific antibody combinations: anti-HIV-1 CA and anti-  
336 Nup358 (Fig 7A-C), and anti-HIV-1 CA and anti-Nup153 (Fig 7D-F). In this assay, direct protein-  
337 protein interactions or proteins spaced < 40 nm apart can be visualised as foci by  
338 immunofluorescence. In addition, by doing *post hoc* analysis, the localisation of these  
339 interactions can be analysed in relation to the nuclear envelope, in this case approximated by  
340 DAPI staining. Fig 7A shows representative cells assayed for CA-Nup358 co-localisation at 8 hpi.  
341 Counting the number of foci per cell (Fig 7B) revealed that there were similar levels of interaction  
342 between CA and Nup358 throughout the time course of infection, and there was no significant  
343 difference between WT and A14C/E45C infections. The localisation of these foci (Fig 7C) seemed  
344 to be around the DAPI edge for both VLP, but with a tendency for WT foci to be further into the

345 nucleus than A14C/E45C foci. This suggests that there is little difference in the early stages of  
346 infection, up to reaching the nuclear pore, between WT and A14C/E45C VLP, and, once again,  
347 that cores reach the nucleus within 2 hpi, sooner than previously expected. In contrast, there  
348 were clear differences in the staining for CA-Nup153 co-localisation between WT and A14C/E45C  
349 infections (Fig 7D-F). Analysis of the number of foci per cell showed that there was increased  
350 A14C/E45C foci compared to WT infections at all time points (Fig 7E). As equal numbers of cores  
351 were arriving at the nucleus, as measured by CA-Nup358 staining (Fig 7B), this suggests that the  
352 A14C/E45C cores were spending more time at the nuclear pore. Moreover, the A14C/E45C foci  
353 appeared to localise at the cytoplasmic side of the DAPI edge while the WT foci were mainly on  
354 the nuclear side (Fig 7F). Given that a layer of lamin and the nuclear envelope surround the  
355 chromatin in the nucleus, the DAPI edge does not indicate the exact nuclear/cytoplasmic  
356 boundary, but rather the inner side of the nuclear pore. Thus, being on the cytoplasmic side of  
357 the DAPI staining, together with increased CA-Nup153 staining, suggests that A14C/E45C hyper-  
358 stable cores are being trapped at the NPC.

359

360 **CPSF6 is not re-localised to nuclear speckles during infection with hyper-stable mutants.**

361

362 In addition to binding nuclear pore proteins, CA interacts with CPSF6, which has been reported  
363 to direct HIV-1 integration site specificity. Specifically, CPSF6 is proposed to locate HIV-1 to highly  
364 transcribing regions of the genome identified as nuclear speckles, or speckle-associated domains  
365 (SPADs) [9, 34, 35]. The absence of CPSF6, or blocking of CPSF6-CA binding, promotes integration  
366 into lamina-associated domains (LADs), regions of heterochromatin near the nuclear envelope

367 [9, 34]. Unfortunately, despite repeated attempts, we were unable to optimise our PLA assay to  
368 reliably visualise CA-CPSF6 co-localisation. However, recently, it has been observed that CPSF6  
369 only redistributes to SPADs during WT HIV-1 infection and not during infection with CPSF6-  
370 binding deficient mutants A77V and N74D [35, 48]. This suggests that the CA-CPSF6 interaction  
371 is driving CPSF6 reorganisation in the nucleus. Therefore, to investigate the interaction between  
372 our hyper-stable mutants and CPSF6, we monitored the reorganisation and redistribution of  
373 CPSF6 to SPADs during infection. HeLa cells were synchronously infected with equal RT units of  
374 WT, A14C/E45C, E180C or M68C/E212C VLP. At 16 hpi, cells were fixed and immuno-stained with  
375 antibodies against HIV-1 CA, CPSF6 and SC35, also called serine and arginine rich splicing factor 2  
376 (SRSF2), which is a marker for SPADs [62]. Due to the species of the antibodies, we could only co-  
377 stain for pairs of markers at a time. Fig 8A and Fig S3 show that cells infected with WT-HIV-1  
378 exhibit a compelling redistribution of CPSF6 into puncta that co-localise with SC35-positive  
379 nuclear speckles, confirming previous reports [35, 48]. However, there was no such redistribution  
380 of CPSF6 during infection with any of the hyper-stable mutants which showed similar CPSF6  
381 staining to uninfected cells. Importantly, when we co-stained for CA and CPSF6, ~80% of WT CA  
382 positive cells contained CPSF6 puncta (Fig 8B), compared to only 5% of hyper-stable CA positive  
383 cells. Although we were able to detect some CA signal in the nucleus of WT HIV-1 infected cells  
384 that colocalised with the CPSF6 signal by immunofluorescence (Fig 8B), the CA signal was  
385 relatively weak and we cannot say whether this CA was part of a core or not. The CA staining in  
386 the nucleus was not as evident during infection with the hyper-stable mutants. Together, these  
387 data show that WT CA is able to interact with CPSF6 and induce its redistribution to SPADs, whilst  
388 the hyper-stable CA fail to alter CPSF6 localisation.

389

## 390 **DISCUSSION**

391

392 It has been known for many years that HIV-1 can infect non-dividing cells and so must cross the  
393 nuclear envelope during infection. Until recently, the dogma was that HIV-1 cores uncoated in  
394 the cytoplasm during reverse transcription, because they were too large to cross the nuclear  
395 pore. However, new evidence has led people to re-examine this order of events. When and where  
396 the CA lattice breaks down is currently highly controversial. Theories range from cytoplasmic  
397 uncoating to uncoating at the nuclear pore (reviewed in [63]) [35, 38, 39, 42, 64], and more  
398 recently, uncoating inside the nucleus [43, 44, 48, 65]. Along these lines, emerging electron  
399 microscopy images appear to show intact cores going through nuclear pores [65]. Some open  
400 questions are (1) Can reverse transcription complete inside a core? (2) Can a complete core cross  
401 the nuclear pore? (3) What replication events require CA? and (4) When is uncoating required?  
402 Unfortunately, uncoating is difficult to measure directly. Therefore, in this study, we have taken  
403 a genetic approach to investigating uncoating by comparing the replication of WT HIV-1 with  
404 hyper-stable CA mutants that are potentially slower or unable to uncoat. Thus, we have not asked  
405 “where/when does uncoating occur?”, but rather “where/when does viral replication get blocked  
406 if uncoating is prevented?”.

407

408 We compared a panel of mutants designed to induce disulphide bonds at different CA lattice  
409 interfaces. Many of these have previously been used for structural studies and clearly induced  
410 stability of *in vitro* assembled CA [7, 8, 11, 12, 57, 66-69], but anecdotally were thought unlikely

411 to make stabilising disulphide bonds in the reducing environment of the cytoplasm. Nevertheless,  
412 we found that two previously described intra-hexamer mutants, A14C/E45C and M68C/E212C  
413 [11, 12, 57], and a novel inter-hexamer mutant, E180C, all showed increased lattice stability in  
414 cells (Fig 2A and Fig 6) and maintained disulphide bonds following infection (Fig 5A). Interestingly,  
415 these three mutants represent stabilising different interfaces within the CA lattice. Thus, it  
416 appears that no particular interface is dominant in lattice stability. It was not surprising that most  
417 of the mutants did not increase core stability, as there is a lot of variation in the exact C $\beta$ -C $\beta$   
418 distances between individual residues, depending on the region of the lattice that they reside  
419 (i.e. depending on the curvature of that part of the fullerene cone [5, 66]). This is especially true  
420 around the trimeric interface. It is intriguing that the NTD-NTD mutant A14C/E45C resulted in  
421 hyper-stable cores whilst the NTD-NTD mutant A42C/T54C did not, as they have near identical  
422 hexamer crystal structures [12, 67]. However, the geometry and exact chemistry of the  
423 surrounding environment likely affect whether disulphide bonds form in cells.

424

#### 425 **Uncoating is required between reverse transcription and integration**

426

427 As expected, although they produced normal viral titres as measured by particle release (Fig S1),  
428 most of the mutants in the panel had reduced infectivity (Fig 3). The intra-hexamer mutants were  
429 the least infectious, perhaps highlighting the importance of residues within the CA N-terminal  
430 domain for early replication steps. The severity of the infectivity defect did not correlate with  
431 core stability, as measured by the fate-of-CA assay, but did generally reflect the level of reverse  
432 transcription (Fig 4G and H). The exceptions to this were the three mutants identified as hyper-

433 stable. Surprisingly, despite uncoating previously being linked to reverse transcription [38, 49,  
434 51, 61, 70], A14C/E45C and E180C were able to reverse transcribe to approximately WT levels  
435 and, furthermore, showed only a partial reduction in 2-LTR circle production (Fig 4 and Fig 5B).  
436 This shows that reverse transcription can complete in a hyper-stable core and implies that it is  
437 not necessary for the core to uncoat in order to accommodate the double stranded DNA. These  
438 results are in line with previous studies showing that hyper-stable mutants E45A, Q63A/Q67A,  
439 5Mut (Q67H/K70R/H87P/T107N/L111) and A14C/E45C can reverse transcribe [48, 52, 71, 72] and  
440 with a recent report saying that reverse transcription can complete in whole WT cores [43].  
441 However, it is possible that the hyper-stable cores are partially opened. Indeed, the production  
442 of 2-LTR circles would imply that the core was open to some extent in order for the cellular ligases  
443 to access the viral DNA. Recent *in vitro* studies have suggested that reverse transcription  
444 increases the pressure inside the core [61], inducing mechanical changes in the capsid that  
445 progressively remodel the lattice [73, 74] and may result in viral DNA loops bursting out of  
446 partially uncoated cores [75]. This agrees with our previous assessment that uncoating is  
447 triggered after first strand transfer during reverse transcription [51]. By inducing disulphide bond  
448 formation, we may have prevented some or all of these remodelling changes occurring in the  
449 hyper-stable mutant cores, and therefore prevented more extensive uncoating from occurring.  
450 This implies that whilst reverse transcription promotes uncoating, it is not dependent on the  
451 disassembly of the lattice. Instead, the virus appears to be using reverse transcription to time  
452 uncoating.  
453 Nonetheless, hyper-stability can be detrimental for reverse transcription as the M68C/E212C  
454 mutant showed a 10-fold decrease in reverse transcription products compared to WT (Fig 4D).

455 The cysteine residues introduced in M68C/E212C are located on the intra-hexamer NTD-CTD  
456 interface, which is important for the curvature of the lattice. Christensen *et al.* recently reported  
457 that the compound GS-CA1, which binds at the NTD-CTD interface, affected capsid integrity and  
458 strongly inhibited reverse transcription *in vitro*, and proposed that affecting the NTD-CTD  
459 interface introduces lattice strain and promotes capsid fracturing [75]. Thus, it could be possible  
460 that the formation of disulphide bonds at this specific interface affects the structure of the CA  
461 lattice in such a way that is not compatible with reverse transcription.

462 Importantly, even the mutants that reverse transcribed well were still markedly impaired for  
463 integration (Fig 5B), presumably meaning that the cores are unable to open fully, or in the correct  
464 manner to allow integration. This agrees with various recent reports suggesting that a final capsid  
465 uncoating reaction needs to occur before integration can take place [35, 39, 42-44, 48, 64, 65].  
466 Stabilising the CA lattice by either mutation, or drugs, probably affects flexibility as well as lattice  
467 break down, so it is hard to separate whether the core needs to restructure in some way or to  
468 break apart completely. We therefore use the term “CA remodelling” to cover both of these  
469 events.

470

471 The link between reverse transcription and uncoating has recently taken a new twist, as the  
472 location of reverse transcription in the cell has been questioned. There is increasing evidence  
473 that CA-containing viral complexes reach the nucleus early, before reverse transcription has  
474 completed [35, 43, 44, 48, 76, 77], and that reverse transcription actually completes in the  
475 nucleus [44]. In support of nuclear-associated reverse transcription, here, we also detected CA

476 and, importantly, IN in nuclear fractions at 4 hpi (Fig 6E) and detected CA interacting with nuclear  
477 pore proteins at 2 hpi (Fig 7), well before the peak of reverse transcription at 6hpi (Fig 4).

478

#### 479 **Hyper-stable CA mutants are compromised for nuclear entry**

480

481 As two of our hyper-stable mutants seemed to have a major defect after reverse transcription,  
482 we asked whether these hyper-stable cores could enter the nucleus. 2-LTR circles are considered  
483 a surrogate for nuclear entry [78, 79], and as A14C/E45C and E180C produced 2-LTR circles, albeit  
484 with a 5-fold decrease compared to WT (Fig 5B), it suggested that they could indeed enter the  
485 nucleus. Our subcellular fractionation experiments confirmed that both WT and hyper-stable CA  
486 were detected in all fractions following infection, including both soluble and chromatin-  
487 associated nuclear fractions (Fig 6). To confirm where the nuclear envelope fractionated, we  
488 blotted for lamin B1 which is located inside the inner layer of the nuclear envelope. Lamin B1 was  
489 detected in the nucleus and, to a lesser extent, in the chromatin fraction (Fig 6B), suggesting that  
490 the CA in these fractions could be at the nuclear envelope as well as inside the nucleus.  
491 Importantly, chromatin is known to be tightly linked with nuclear pores and lamin [80]. There  
492 was noticeably less WT HIV-1 CA present at each time point than the hyper-stable mutant CA,  
493 particularly in the nuclear fractions, suggesting that it was turned over faster (Fig 6E and F),  
494 although it is also possible that WT CA was more susceptible to degradation during the  
495 fractionation process. Conversely, the levels of IN were similar at all time points between WT and  
496 hyper-stable infections in all fractions except the chromatin associated fraction, where there was  
497 more IN detected following WT infections. As WT CA was barely detectable here (Fig 6F), this



498 could reflect WT cores being able to breakdown and deliver IN more efficiently to the chromatin  
499 than A14C/E45C cores, and that once disassembled, the CA is degraded. Together, these data  
500 show that although the hyper-stable cores retain more CA than WT cores, the IN levels are  
501 comparable until the cores meet chromatin. This implies that uncoating has little impact on  
502 replication until a chromatin associated event.

503

504 To explore whether hyper-stable cores could truly enter the nucleus or were associating with  
505 nuclear membranes, we studied the dynamics of WT and A14C/E45C CA interactions with nuclear  
506 pore proteins (Fig 7). We chose Nup358 and Nup153 because they are located on the outer and  
507 inner face of the nuclear pore, respectively, and because their interaction with CA is well  
508 characterised [25, 26, 29, 30]. We found that WT and A14C/E45C CA showed similar levels of  
509 interaction with Nup358 over time (Fig 7B) suggesting that both cores could reach the nuclear  
510 pore with equivalent kinetics, agreeing with our fractionation experiments. As seen in a previous  
511 report [81], we observed some CA-Nup358 foci in the cytoplasm, which was more noticeable  
512 during A14C/E45C infection, but there were no significant differences between the WT and  
513 mutant CA distribution (Fig 7C). In contrast, there was clear divergence in the co-localisation of  
514 CA and Nup153 between WT and hyper-stable cores. There were significantly increased numbers  
515 of foci for the A14C/E45C CA at all time points. As equal numbers of cores were arriving at the  
516 nucleus (as measured by Nup358 co-localisation), this suggests that the A14C/E45C cores were  
517 spending more time at the nuclear pore. Moreover, the A14C/E45C foci appeared to localise  
518 more towards the cytoplasmic side of the DAPI edge while the WT foci were mainly on the nuclear  
519 side, suggesting that WT cores travel further into the nucleus and that A14C/E45C hyper-stable

520 cores are trapped at the NPC. It is worth pointing out that quantifying the distance of the PLA foci  
521 to the DAPI edge has caveats. The PLA signal is the result of a complex of rolling circle  
522 amplification products together with antibodies bound to two proteins of interest. As this is a big  
523 complex, the foci distance to the DAPI edge cannot be taken as an absolute distance. However,  
524 the same caveats apply to both WT and mutant cores, so a relative comparison can be made.  
525 Thus, it seems that uncoating or lattice flexibility is required for nuclear entry and points to a CA  
526 remodelling event at the nuclear pore, as suggested by some other labs [42, 65]. It is interesting  
527 to recall that the A14C/E45C mutant still produces 2-LTR circles, despite apparent limited nuclear  
528 entry, questioning what this product really represents.

529

530 Interestingly, studies with the CPSF6 binding-defective HIV-1 CA mutants, N74D and A77V, have  
531 reported that a longer residence time at the nuclear envelope promotes integration into  
532 heterochromatin regions close to the nuclear envelope [9, 34, 35, 43, 48]. Furthermore, unlike  
533 WT HIV-1, neither the N74D nor the A77V mutant can re-localise CPSF6 to SPADs, showing that  
534 this is a CA dependent event [9, 34, 35, 48]. Since A14C/E45C cores were stalled at the nuclear  
535 pore, we were intrigued to see whether this mutant would be able to promote CPSF6  
536 redistribution to nuclear speckles. In agreement with very recent reports [35, 48], we found that  
537 only WT-infected cells showed a redistribution of CPSF6 to SC35 positive puncta (Fig 8).  
538 Importantly, A14C/E45C is still able to bind CPSF6 *in vitro* [82, 83], suggesting that either it does  
539 not have access to CPSF6 in cells, or that it is unable to relocate to nuclear speckles because it is  
540 retained elsewhere. CPSF6 binds to the same pocket on the CA lattice as Nup153 [29, 31, 32] and  
541 Bejarano *et al* have recently reported the consecutive binding of the hexameric CA lattice to

542 Nup153 and then CPSF6 in macrophages [40]. Thus, we speculate that if A14C/E45C is still binding  
543 Nup153 at the nuclear pore, it might not be able to uncouple and move on to binding CPSF6. We  
544 hypothesize that the CA lattice needs to remodel at the pore in order to be released from Nup153  
545 and move into the nucleus, where it can then interact with CPSF6 and move to an optimal site  
546 for integration. As CA is required for the CPSF6 interaction, it follows that a fraction of CA must  
547 be retained by the pre-integration complex until chromatin binding, but sufficient CA must be  
548 removed to allow IN and the viral cDNA to access chromatin for integration itself to occur.

549

### 550 **Models of HIV-1 uncoating**

551

552 We have illustrated the current models of HIV-1 uncoating in Fig 9. From left to right, uncoating  
553 in the cytoplasm, uncoating at the nuclear pore, uncoating inside the nucleus or uncoating at the  
554 integration site. Early uncoating or a failure to uncoat both have detrimental effects on virus  
555 infectivity. The data presented here point to a remodelling event at the nuclear envelope that,  
556 although it is not required for reverse transcription to complete, is needed to completely pass  
557 through the nuclear pore, allow binding to CPSF6 and, ultimately, for integration. We therefore  
558 think it likely that some sort of uncoating event begins at the nuclear pore and finishes at the site  
559 of integration. We have also previously shown that the murine leukaemia virus (MLV) p12 protein  
560 binds directly to both CA and nucleosomes, tethering the MLV core to chromatin during mitosis,  
561 and have proposed that p12 could be acting in a similar capacity to CPSF6 in HIV-1 infection [84].  
562 Figure 9 includes our model of MLV uncoating. As MLV cannot traverse nuclear pores [85] it is  
563 unlikely that it undergoes a similar pore-induced CA remodelling event, suggesting that MLV

564 uncoating might be triggered by chromatin binding. As MLV must wait for mitosis, it is possible  
565 that an intact CA lattice is needed until integration to provide a protective environment for the  
566 viral cDNA.

567

568 In conclusion, we have demonstrated that HIV-1 with a hyper-stable CA lattice is able to reverse  
569 transcribe successfully but is stalled at nuclear entry, which has a negative effect on CPSF6  
570 binding and integration. We suggest that an uncoating or CA remodelling event normally occurs  
571 at the nuclear pore and that this is essential for the later replication events that take place in the  
572 nucleus. Furthermore, our observations suggest that viral cores are present at the nucleus before  
573 reverse transcription is completed. Therefore, it is plausible that both reverse transcription and  
574 uncoating finish in the nucleus. Further work is needed to fully understand the state of the CA  
575 lattice in the nucleus and the exact relationship between uncoating and reverse transcription.

576

## 577 **MATERIAL & METHODS**

578

### 579 **Cell lines**

580

581 Adherent cell lines, 293T, HeLa and Vero cells, were maintained in Dulbecco's modified Eagle  
582 medium (Thermo Fisher), and suspension cell lines, SupT1 and U937 cells, were maintained in  
583 RPMI-1640 (Thermo Fisher). All cell lines were authenticated and tested mycoplasma-free from  
584 Bishop laboratory cell stocks. Media was supplemented with 10% heat-inactivated foetal bovine

585 serum (FBS; Biosera) and 1% Penicillin/Streptomycin (Sigma). Cells were grown in a humidified  
586 incubator at 37°C and 5% CO<sub>2</sub>.

587

### 588 **Plasmids and site-directed mutagenesis**

589

590 The plasmids used to produce HIV-1 VLP, pVSV-G, pCMVΔR8.91 and pCSGW, have been described  
591 previously [86, 87]. To create Gag-Pol plasmids carrying cysteine-substitution mutations in CA,  
592 site-directed mutagenesis was performed on pCMVΔR8.91 using the QuickChange II-XL site-  
593 directed mutagenesis kit (Agilent) according to manufacturer's instructions and using the primers  
594 listed in Supplementary Table 1. Repeated site-directed mutagenesis was performed to create  
595 the double, triple and quadruple mutants. The introduction of the desired mutations was  
596 confirmed by Sanger sequencing (Source Bioscience).

597

### 598 **Virus-like particle (VLP) production**

599

600 HIV-1 virus-like particles (VLP) were produced by co-transfecting 293T cells with a 1:1:1 ratio of  
601 three plasmids: pVSV-G, pCSGW (GFP-reporter) and pCMVΔ8.91 (or pCMVΔ8.91 mutants).  
602 Approximately 16h post-transfection, cells were treated with 10mM sodium butyrate for 8h and  
603 VLP-containing supernatants were harvested 24 h later. VLP titres were analysed using a Lenti RT  
604 ELISA kit (Cavidi) following manufacturer's instructions. For the fate-of-capsid, cell fractionation  
605 and PLA assays, VLPs were concentrated by ultracentrifugation through a 20% (w/w) sucrose  
606 cushion using a Beckman SW32Ti rotor (Beckman-Coulter) at 20,200 rpm for 2h at 4°C.

607

608 **Single round infectivity assay**

609

610 293T, HeLa, SupT1 and U937 cells were challenged with normalised amounts of WT and mutant  
611 VLP based on their RT activity and incubated for 72 h at 37°C. The percentage of GFP-expressing  
612 cells was analysed by flow cytometry using a FACS VERSE, LSR or Fortessa A analysers (BD  
613 Biosciences). Data was analysed using FlowJo software.

614

615 **Immunoblotting**

616

617 Cells were lysed in ice-cold radioimmunoprecipitation assay (RIPA) buffer (Thermo Fisher)  
618 supplemented with a protease inhibitor cocktail (Roche) and proteins were separated on 4-12%  
619 or 10% Bis-Tris SDS-PAGE gels (Thermo Fisher). To assess disulphide cross-linking in cells, 4x SDS  
620 sample buffer (Thermo Scientific) was added to cell lysates prior to treatment with 50mM  
621 Iodoacetamide (Sigma) or 0.1M DTT (Sigma). Samples treated with Iodoacetamide were  
622 incubated for 30min at room temperature followed by a 15 min incubation at 65°C. Samples  
623 treated with DTT were boiled at 95°C for 5 min. Samples were then applied to 8% Bolt Bis-Tris  
624 Plus gels (Thermo Fisher) and electrophoresed in Bolt MOPS buffer (Thermo Fisher). Primary  
625 antibodies used were: anti-HIV-1 CA (in house), anti-HIV-1 IN (in house), anti-HSP90 (CST; #4874),  
626 anti-Calnexin (CST; #2679), anti-HDAC2 (CST; #5113), anti-Histone 3 (CST; #14269), anti-Tubulin-  
627  $\alpha$  (Bio-Rad; VMA00051) and anti-Lamin B1 (Proteintech; 66095-1-Ig). Secondary antibodies used  
628 were: anti-mouse and anti-rabbit HRP-conjugated secondary antibodies (Thermo Fisher; 61-6520

629 and 31460); anti-mouse IRDye 800CW secondary antibodies (LICOR). Blots were analysed on a  
630 Chemidoc imaging system (Bio-Rad) or by X-ray film exposure or on an Odyssey CLx imaging  
631 system (LICOR).

632

### 633 **Fate-of-capsid assay**

634

635 The fate-of-capsid assay was performed as previously described (Yang *et al*, 2014) but with some  
636 modifications. HeLa cells were seeded at  $10^6$  cells/well in 6-well plates one day prior infection  
637 and spinoculated (1600rpm at 16°C for 30min, followed by 37°C for 1h) with equal amounts of  
638 VLP based on their RT activity. Cells were harvested at 2 and 20 hpi and cell pellets were lysed by  
639 adding hypotonic buffer (10mM Tris-HCl pH 8.0, 10mM KCl and 1mM EDTA pH 8.0 supplemented  
640 with a protease inhibitor cocktail (Roche)) and passing through a Qiashredder column (Qiagen).  
641 At this point, 50  $\mu$ L was harvested as the input (I) and resuspended in 2x Laemmli's SDS-PAGE  
642 sample loading buffer (Sigma). The remaining lysate was layered on top of a 30% (w/w) sucrose  
643 cushion and centrifuged using a Beckman SW41 rotor (Beckman Coulter) at 32,000rpm and 4°C  
644 for 1 h, to separate soluble and assembled CA. After centrifugation, 500  $\mu$ L of the uppermost  
645 portion of the supernatant was harvested as the soluble fraction (S). Following aspiration of the  
646 sucrose cushion, the pellet (P) was resuspended in 100  $\mu$ L of 2x sample loading buffer. The soluble  
647 fraction was precipitated using methanol-chloroform extraction and resuspended in 100  $\mu$ L of 2x  
648 sample loading buffer. Then, the I, S and P samples were analysed by western blotting with an  
649 anti-HIV-1 CA antibody.

650

651 **Quantitative PCR analysis to measure RT products**

652

653 Quantitative PCR analysis was conducted as previously described (Bishop *et al*, 2008; Cosnefroy  
654 *et al*, 2016). Briefly, VLP were treated with 20 units/mL RQ1-DNase (Promega) in 10mM MgCl<sub>2</sub>  
655 for 1h at 37°C before infection. 293T cells were spinoculated (1600rpm at 16°C for 30min)  
656 followed by a 30min incubation at 37°C. The reverse transcriptase inhibitor Nevirapine (NVP;  
657 Sigma) was used as a negative control, prepared in DMSO and used at a final concentration of 10  
658 µM. Cells were harvested at the indicated times post-infection and total DNA was extracted using  
659 the DNeasy Blood & Tissue kit (Qiagen). The extracted DNA was digested with 1 unit/µL DpnI  
660 (Thermo Fisher) for 2.5 h at 37°C. qPCR was performed in TaqMan real-time PCR master mix  
661 (Thermo Fisher) with 900 nM primers and 250 nM probes. The reactions were performed on a  
662 7500 fast real-time PCR system (Applied Biosystems). To calculate DNA copy numbers, standard  
663 curves were generated from serial dilutions of pCSGW or p2-LTR junction in 293T cellular DNA.  
664 The following primers and probes were used; strong stop cDNA products: *for* 5'-  
665 TAACTAGGGAACCCACTGC, *rev* 5'-GCTAGAGATTTTCCACACTG and *probe* 5'-FAM-  
666 ACACAACAGACGGGCACACACTA-TAMRA; second strand cDNA products: *for* 5'-  
667 TAACTAGGGAACCCACTGC, *rev* 5'-CTGCGTCGAGAGAGCTCCTCTGGTT and *probe* 5'-FAM-  
668 ACACAACAGACGGGCACACACTA-TAMRA; 2-LTR junction: *for* 5'-GTGTGTGCCCGTCTGTTG, *rev* 5'-  
669 CAGTACAAGCAAAAAGCAGATC and *probe* 5'-FAMGGTAACTAGAGATCCCTCAGACCTAMRA.

670

671 **Cell fractionation assay**

672



673 HeLa cells were infected with equal amounts of WT and mutant VLP (based on their RT activity)  
674 by spinoculation (1600rpm, 16°C for 2h) followed by a 30 min incubation at 37°C. At the indicated  
675 times post-infection, cells were harvested in parallel either as a whole cell lysate (WCL) or for  
676 processing with the subcellular protein fractionation kit for cultured cells (Thermo Fisher)  
677 following manufacturer's instructions. Protein content in the WCL and in the different fractions  
678 was measured by BCA assay (Thermo Fisher) using a FLUOstar Omega plate reader (BMG  
679 Labtech). Relative amounts of each fraction compared to the WCL were analysed by  
680 immunoblotting.

681

## 682 **Immunofluorescence**

683

684 HeLa cells were seeded at  $0.8 \times 10^5$  cells/well on 13 mm glass coverslips in 24-well plates the day  
685 prior to infection. Cells were infected with equal RT units of WT or mutant VLP by spinoculation  
686 (1600rpm, 16°C for 2h) followed by a 30min incubation at 37°C. At the indicated times post-  
687 infection, cells were washed twice with ice-cold PBS, fixed with PBS supplemented with 4%  
688 paraformaldehyde for 5min at room temperature followed by an ice-cold methanol incubation  
689 for 5min at -20°C, and washed twice again with ice-cold PBS. After permeabilization with 0.5%  
690 saponin (Sigma) in PBS for 30min at room temperature, cells were blocked in 5% donkey serum  
691 (DS; Sigma) and 0.5% saponin in PBS for, at least, 1h at room temperature. Then, cells were  
692 incubated with the following primary antibodies: anti-HIV-1 CA (in house), anti-CPSF6 (Atlas;  
693 HPA039973) and anti-SC35 (Abcam; ab11826), diluted in 1% DS with 0.5% saponin in PBS  
694 (antibody buffer) for 1h at RT. After three washes with PBS, cells were incubated with the

695 following secondary antibodies: goat anti-mouse-AF488 (abcam; ab150117), donkey anti-rabbit-  
696 AF568 (abcam; ab175692), donkey anti-mouse-AF647 (Thermo Fisher; A-31571) and donkey anti-  
697 rabbit-AF647 (Thermo Fisher; A-31573) in antibody buffer for 1h at RT. After three washes with  
698 PBS, the coverslips were mounted on glass slides with ProLong gold antifade mountant with DAPI  
699 (Thermo Fisher).

700

### 701 **Proximity ligation assay (PLA)**

702

703 HeLa cells were seeded at  $10^5$  cells/well on 13mm glass coverslips in 24-well plates the day prior  
704 to infection. Cells were infected with equal RT units of WT or mutant VLP by spinoculation  
705 (1600rpm, 16°C for 2h) followed by a 30min incubation at 37°C. At the indicated times post-  
706 infection, cells were washed twice with ice-cold PBS, fixed with PBS supplemented with 4%  
707 paraformaldehyde for 5min at room temperature followed by an ice-cold methanol incubation  
708 for 5min at -20°C, and washed twice again with ice-cold PBS. Then the immunofluorescence  
709 protocol was followed using the following pairs of primary antibodies: anti-HIV-1 CA (in house)  
710 and anti-Nup358 (Abcam; ab64276); anti-HIV-1 CA (in house) and anti-Nup153 (Abcam;  
711 ab84872), diluted in 1% DS with 0.5% saponin in PBS for 1h at RT. From this point, the Duolink  
712 PLA fluorescence detection kit's protocol (Sigma) was followed. After three washes with PBS,  
713 coverslips were incubated with secondary antibodies conjugated to PLA probes (anti-mouse PLUS  
714 or anti-rabbit MINUS; Sigma) in antibody buffer (Sigma) for 1h at 37°C. Coverslips were incubated  
715 with ligase for 30 min at 37°C followed by amplification by polymerase for 100 min at 37°C. From  
716 the primary antibody incubation, coverslips were washed with buffers A and B (Sigma) as

717 indicated in the manufacturer's protocol. Finally, coverslips were mounted with the Duolink *in*  
718 *situ* mounting media with DAPI (Sigma) on glass slides (Menzel-Gläser) and sealed. Samples were  
719 visualised on a SP5 inverted confocal microscope (Leica) using a 63X objective. Longitudinal Z-  
720 series were acquired with 0.5  $\mu\text{m}$  step sizes. Image analysis was performed using the GIANI plug-  
721 in in Fiji (described in [88]). The number of foci and their distance to the edge of the DAPI staining,  
722 were quantified taking into account the 3D cell volume reflected by the longitudinal Z-series.

723

## 724 **Statistics**

725

726 Statistical analyses were carried out using GraphPad Prism 9 software. Differences between  
727 conditions was estimated by one-way ANOVA complemented with Turkey's *post hoc* test (\*,  $P <$   
728 0.05; \*\*,  $P < 0.01$ ; \*\*\*,  $P < 0.001$ ; \*\*\*\*,  $P < 0.0001$ ).

729

## 730 **ACKNOWLEDGEMENTS**

731

732 We thank David J Barry (Advanced Light Microscopy, The Francis Crick Institute) for help with  
733 microscopy data analysis. We are grateful to Joe Brock (Communications, The Francis Crick  
734 Institute) for helping design Fig 9. We acknowledge Jonathan Stoye for helpful discussions. For  
735 the purpose of Open Access, the authors have applied a CC BY public copyright licence to any  
736 Author Accepted Manuscript version arising from this submission.

737

738 **FUNDING**

739

740 This work was supported by the Francis Crick Institute, which receives its core funding from  
741 Cancer Research UK (FC001042, FC001178), the UK Medical Research Council (FC001042,  
742 FC001178), and the Wellcome Trust (FC001042, FC001178). The funders had no role in study  
743 design, data collection and analysis, decision to publish, or preparation of the manuscript.

744

745 **REFERENCES**

746

- 747 1. McDonald D, Vodicka MA, Lucero G, Svitkina TM, Borisy GG, Emerman M, et al.  
748 Visualization of the intracellular behavior of HIV in living cells. *J Cell Biol.* 2002;159(3):441-52.
- 749 2. Ganser BK, Li S, Klishko VY, Finch JT, Sundquist WI. Assembly and analysis of conical  
750 models for the HIV-1 core. *Science.* 1999;283(5398):80-3.
- 751 3. Ganser-Pornillos BK, von Schwedler UK, Stray KM, Aiken C, Sundquist WI. Assembly  
752 properties of the human immunodeficiency virus type 1 CA protein. *J Virol.* 2004;78(5):2545-52.
- 753 4. Pornillos O, Ganser-Pornillos BK, Yeager M. Atomic-level modelling of the HIV capsid.  
754 *Nature.* 2011;469(7330):424-7.
- 755 5. Mattei S, Glass B, Hagen WJ, Krausslich HG, Briggs JA. The structure and flexibility of  
756 conical HIV-1 capsids determined within intact virions. *Science.* 2016;354(6318):1434-7.
- 757 6. Du S, Betts L, Yang R, Shi H, Concel J, Ahn J, et al. Structure of the HIV-1 full-length capsid  
758 protein in a conformationally trapped unassembled state induced by small-molecule binding. *J*  
759 *Mol Biol.* 2011;406(3):371-86.

- 760 7. Deshmukh L, Schwieters CD, Grishaev A, Ghirlando R, Baber JL, Clore GM. Structure and  
761 dynamics of full-length HIV-1 capsid protein in solution. *J Am Chem Soc.* 2013;135(43):16133-47.
- 762 8. Zhao G, Perilla JR, Yufenyuy EL, Meng X, Chen B, Ning J, et al. Mature HIV-1 capsid  
763 structure by cryo-electron microscopy and all-atom molecular dynamics. *Nature.*  
764 2013;497(7451):643-6.
- 765 9. Li W, Singh PK, Sowd GA, Bedwell GJ, Jang S, Achuthan V, et al. CPSF6-Dependent  
766 Targeting of Speckle-Associated Domains Distinguishes Primate from Nonprimate Lentiviral  
767 Integration. *mBio.* 2020;11(5).
- 768 10. Briggs JA, Wilk T, Welker R, Krausslich HG, Fuller SD. Structural organization of authentic,  
769 mature HIV-1 virions and cores. *EMBO J.* 2003;22(7):1707-15.
- 770 11. Pornillos O, Ganser-Pornillos BK, Kelly BN, Hua Y, Whitby FG, Stout CD, et al. X-ray  
771 structures of the hexameric building block of the HIV capsid. *Cell.* 2009;137(7):1282-92.
- 772 12. Pornillos O, Ganser-Pornillos BK, Banumathi S, Hua Y, Yeager M. Disulfide bond  
773 stabilization of the hexameric capsomer of human immunodeficiency virus. *J Mol Biol.*  
774 2010;401(5):985-95.
- 775 13. Ganser-Pornillos BK, Yeager M, Pornillos O. Assembly and architecture of HIV. *Adv Exp*  
776 *Med Biol.* 2012;726:441-65.
- 777 14. Gres AT, Kirby KA, KewalRamani VN, Tanner JJ, Pornillos O, Sarafianos SG. STRUCTURAL  
778 VIROLOGY. X-ray crystal structures of native HIV-1 capsid protein reveal conformational  
779 variability. *Science.* 2015;349(6243):99-103.
- 780 15. Le Sage V, Mouland AJ, Valiente-Echeverria F. Roles of HIV-1 capsid in viral replication and  
781 immune evasion. *Virus Res.* 2014;193:116-29.

- 782 16. Rasaiyaah J, Tan CP, Fletcher AJ, Price AJ, Blondeau C, Hilditch L, et al. HIV-1 evades innate  
783 immune recognition through specific cofactor recruitment. *Nature*. 2013;503(7476):402-5.
- 784 17. Stremlau M, Owens CM, Perron MJ, Kiessling M, Autissier P, Sodroski J. The cytoplasmic  
785 body component TRIM5alpha restricts HIV-1 infection in Old World monkeys. *Nature*.  
786 2004;427(6977):848-53.
- 787 18. Malim MH, Bieniasz PD. HIV Restriction Factors and Mechanisms of Evasion. *Cold Spring*  
788 *Harb Perspect Med*. 2012;2(5):a006940.
- 789 19. Franke EK, Yuan HE, Luban J. Specific incorporation of cyclophilin A into HIV-1 virions.  
790 *Nature*. 1994;372(6504):359-62.
- 791 20. Bosco DA, Eisenmesser EZ, Pochapsky S, Sundquist WI, Kern D. Catalysis of cis/trans  
792 isomerization in native HIV-1 capsid by human cyclophilin A. *Proc Natl Acad Sci U S A*.  
793 2002;99(8):5247-52.
- 794 21. Gamble TR, Vajdos FF, Yoo S, Worthylake DK, Houseweart M, Sundquist WI, et al. Crystal  
795 structure of human cyclophilin A bound to the amino-terminal domain of HIV-1 capsid. *Cell*.  
796 1996;87(7):1285-94.
- 797 22. Sabo Y, Walsh D, Barry DS, Tinaztepe S, de Los Santos K, Goff SP, et al. HIV-1 induces the  
798 formation of stable microtubules to enhance early infection. *Cell Host Microbe*. 2013;14(5):535-  
799 46.
- 800 23. Lukic Z, Dharan A, Fricke T, Diaz-Griffero F, Campbell EM. HIV-1 uncoating is facilitated by  
801 dynein and kinesin 1. *J Virol*. 2014;88(23):13613-25.

- 802 24. Malikov V, da Silva ES, Jovasevic V, Bennett G, de Souza Aranha Vieira DA, Schulte B, et al.  
803 HIV-1 capsids bind and exploit the kinesin-1 adaptor FEZ1 for inward movement to the nucleus.  
804 Nat Commun. 2015;6:6660.
- 805 25. Brass AL, Dykxhoorn DM, Benita Y, Yan N, Engelman A, Xavier RJ, et al. Identification of  
806 host proteins required for HIV infection through a functional genomic screen. Science.  
807 2008;319(5865):921-6.
- 808 26. Konig R, Zhou Y, Elleder D, Diamond TL, Bonamy GM, Irelan JT, et al. Global analysis of  
809 host-pathogen interactions that regulate early-stage HIV-1 replication. Cell. 2008;135(1):49-60.
- 810 27. Christ F, Thys W, De Rijck J, Gijsbers R, Albanese A, Arosio D, et al. Transportin-SR2 imports  
811 HIV into the nucleus. Curr Biol. 2008;18(16):1192-202.
- 812 28. Fernandez J, Machado AK, Lyonnais S, Chamontin C, Gartner K, Leger T, et al. Transportin-  
813 1 binds to the HIV-1 capsid via a nuclear localization signal and triggers uncoating. Nat Microbiol.  
814 2019;4(11):1840-50.
- 815 29. Matreyek KA, Engelman A. The requirement for nucleoporin NUP153 during human  
816 immunodeficiency virus type 1 infection is determined by the viral capsid. J Virol.  
817 2011;85(15):7818-27.
- 818 30. Di Nunzio F, Danckaert A, Fricke T, Perez P, Fernandez J, Perret E, et al. Human  
819 nucleoporins promote HIV-1 docking at the nuclear pore, nuclear import and integration. PLoS  
820 One. 2012;7(9):e46037.
- 821 31. Price AJ, Jacques DA, McEwan WA, Fletcher AJ, Essig S, Chin JW, et al. Host cofactors and  
822 pharmacologic ligands share an essential interface in HIV-1 capsid that is lost upon disassembly.  
823 PLoS Pathog. 2014;10(10):e1004459.

- 824 32. Bhattacharya A, Alam SL, Fricke T, Zadrozny K, Sedzicki J, Taylor AB, et al. Structural basis  
825 of HIV-1 capsid recognition by PF74 and CPSF6. *Proc Natl Acad Sci U S A*. 2014;111(52):18625-30.
- 826 33. Chin CR, Perreira JM, Savidis G, Portmann JM, Aker AM, Feeley EM, et al. Direct  
827 Visualization of HIV-1 Replication Intermediates Shows that Capsid and CPSF6 Modulate HIV-1  
828 Intra-nuclear Invasion and Integration. *Cell Rep*. 2015;13(8):1717-31.
- 829 34. Achuthan V, Perreira JM, Sowd GA, Puray-Chavez M, McDougall WM, Paulucci-  
830 Holthauzen A, et al. Capsid-CPSF6 Interaction Licenses Nuclear HIV-1 Trafficking to Sites of Viral  
831 DNA Integration. *Cell Host Microbe*. 2018;24(3):392-404 e8.
- 832 35. Francis AC, Marin M, Singh PK, Achuthan V, Prellberg MJ, Palermino-Rowland K, et al. HIV-  
833 1 replication complexes accumulate in nuclear speckles and integrate into speckle-associated  
834 genomic domains. *Nat Commun*. 2020;11(1):3505.
- 835 36. Miller MD, Farnet CM, Bushman FD. Human immunodeficiency virus type 1 preintegration  
836 complexes: studies of organization and composition. *J Virol*. 1997;71(7):5382-90.
- 837 37. Fassati A, Goff SP. Characterization of intracellular reverse transcription complexes of  
838 human immunodeficiency virus type 1. *J Virol*. 2001;75(8):3626-35.
- 839 38. Mamede JI, Cianci GC, Anderson MR, Hope TJ. Early cytoplasmic uncoating is associated  
840 with infectivity of HIV-1. *Proc Natl Acad Sci U S A*. 2017;114(34):E7169-E78.
- 841 39. Francis AC, Melikyan GB. Single HIV-1 Imaging Reveals Progression of Infection through  
842 CA-Dependent Steps of Docking at the Nuclear Pore, Uncoating, and Nuclear Transport. *Cell Host*  
843 *Microbe*. 2018;23(4):536-48 e6.



- 844 40. Bejarano DA, Peng K, Laketa V, Borner K, Jost KL, Lucic B, et al. HIV-1 nuclear import in  
845 macrophages is regulated by CPSF6-capsid interactions at the nuclear pore complex. *Elife*.  
846 2019;8.
- 847 41. Zurnic Bonisch I, Dirix L, Lemmens V, Borrenberghs D, De Wit F, Vernailen F, et al. Capsid-  
848 Labelled HIV To Investigate the Role of Capsid during Nuclear Import and Integration. *J Virol*.  
849 2020;94(7).
- 850 42. Blanco-Rodriguez G, Gazi A, Monel B, Frabetti S, Scoca V, Mueller F, et al. Remodeling of  
851 the Core Leads HIV-1 Preintegration Complex into the Nucleus of Human Lymphocytes. *J Virol*.  
852 2020;94(11).
- 853 43. Burdick RC, Li C, Munshi M, Rawson JMO, Nagashima K, Hu WS, et al. HIV-1 uncoats in the  
854 nucleus near sites of integration. *Proc Natl Acad Sci U S A*. 2020;117(10):5486-93.
- 855 44. Dharan A, Bachmann N, Talley S, Zwikelmaier V, Campbell EM. Nuclear pore blockade  
856 reveals that HIV-1 completes reverse transcription and uncoating in the nucleus. *Nat Microbiol*.  
857 2020;5(9):1088-95.
- 858 45. Schaller T, Ocwieja KE, Rasaiyaah J, Price AJ, Brady TL, Roth SL, et al. HIV-1 capsid-  
859 cyclophilin interactions determine nuclear import pathway, integration targeting and replication  
860 efficiency. *PLoS Pathog*. 2011;7(12):e1002439.
- 861 46. Hulme AE, Kelley Z, Foley D, Hope TJ. Complementary Assays Reveal a Low Level of CA  
862 Associated with Viral Complexes in the Nuclei of HIV-1-Infected Cells. *J Virol*. 2015;89(10):5350-  
863 61.

- 864 47. Burdick RC, Delviks-Frankenberry KA, Chen J, Janaka SK, Sastri J, Hu WS, et al. Dynamics  
865 and regulation of nuclear import and nuclear movements of HIV-1 complexes. *PLoS Pathog.*  
866 2017;13(8):e1006570.
- 867 48. Selyutina A, Persaud M, Lee K, KewalRamani V, Diaz-Griffero F. Nuclear Import of the HIV-  
868 1 Core Precedes Reverse Transcription and Uncoating. *Cell Rep.* 2020;32(13):108201.
- 869 49. Hulme AE, Perez O, Hope TJ. Complementary assays reveal a relationship between HIV-1  
870 uncoating and reverse transcription. *Proc Natl Acad Sci U S A.* 2011;108(24):9975-80.
- 871 50. Yang Y, Fricke T, Diaz-Griffero F. Inhibition of reverse transcriptase activity increases  
872 stability of the HIV-1 core. *J Virol.* 2013;87(1):683-7.
- 873 51. Cosnefroy O, Murray PJ, Bishop KN. HIV-1 capsid uncoating initiates after the first strand  
874 transfer of reverse transcription. *Retrovirology.* 2016;13(1):58.
- 875 52. Forshey BM, von Schwedler U, Sundquist WI, Aiken C. Formation of a human  
876 immunodeficiency virus type 1 core of optimal stability is crucial for viral replication. *J Virol.*  
877 2002;76(11):5667-77.
- 878 53. von Schwedler UK, Stray KM, Garrus JE, Sundquist WI. Functional surfaces of the human  
879 immunodeficiency virus type 1 capsid protein. *J Virol.* 2003;77(9):5439-50.
- 880 54. Link JO, Rhee MS, Tse WC, Zheng J, Somoza JR, Rowe W, et al. Clinical targeting of HIV  
881 capsid protein with a long-acting small molecule. *Nature.* 2020;584(7822):614-8.
- 882 55. Bester SM, Wei G, Zhao H, Adu-Ampratwum D, Iqbal N, Courouble VV, et al. Structural  
883 and mechanistic bases for a potent HIV-1 capsid inhibitor. *Science.* 2020;370(6514):360-4.
- 884 56. Srinivasan N, Sowdhamini R, Ramakrishnan C, Balaram P. Conformations of disulfide  
885 bridges in proteins. *Int J Pept Protein Res.* 1990;36(2):147-55.

- 886 57. Yufenyuy EL, Aiken C. The NTD-CTD intersubunit interface plays a critical role in assembly  
887 and stabilization of the HIV-1 capsid. *Retrovirology*. 2013;10:29.
- 888 58. Yang Y, Luban J, Diaz-Griffero F. The fate of HIV-1 capsid: a biochemical assay for HIV-1  
889 uncoating. *Methods Mol Biol*. 2014;1087:29-36.
- 890 59. Rietsch A, Beckwith J. The genetics of disulfide bond metabolism. *Annu Rev Genet*.  
891 1998;32:163-84.
- 892 60. Sevier CS, Kaiser CA. Formation and transfer of disulphide bonds in living cells. *Nat Rev*  
893 *Mol Cell Biol*. 2002;3(11):836-47.
- 894 61. Rankovic S, Varadarajan J, Ramalho R, Aiken C, Rousso I. Reverse Transcription  
895 Mechanically Initiates HIV-1 Capsid Disassembly. *J Virol*. 2017;91(12).
- 896 62. Fei J, Jadhavi M, Harmon TS, Li ITS, Hua B, Hao Q, et al. Quantitative analysis of multilayer  
897 organization of proteins and RNA in nuclear speckles at super resolution. *J Cell Sci*.  
898 2017;130(24):4180-92.
- 899 63. Campbell EM, Hope TJ. HIV-1 capsid: the multifaceted key player in HIV-1 infection. *Nat*  
900 *Rev Microbiol*. 2015;13(8):471-83.
- 901 64. Zila V, Muller TG, Laketa V, Muller B, Krausslich HG. Analysis of CA Content and CPSF6  
902 Dependence of Early HIV-1 Replication Complexes in SupT1-R5 Cells. *mBio*. 2019;10(6).
- 903 65. Zila V, Margiotta E, Turonova B, Muller TG, Zimmerli CE, Mattei S, et al. Cone-shaped HIV-1  
904 capsids are transported through intact nuclear pores. *Cell*. 2021.
- 905 66. Byeon IJ, Meng X, Jung J, Zhao G, Yang R, Ahn J, et al. Structural convergence between  
906 Cryo-EM and NMR reveals intersubunit interactions critical for HIV-1 capsid function. *Cell*.  
907 2009;139(4):780-90.

- 908 67. Yeager M. Design of in vitro symmetric complexes and analysis by hybrid methods reveal  
909 mechanisms of HIV capsid assembly. *J Mol Biol.* 2011;410(4):534-52.
- 910 68. Zhao G, Ke D, Vu T, Ahn J, Shah VB, Yang R, et al. Rhesus TRIM5alpha disrupts the HIV-1  
911 capsid at the inter-hexamer interfaces. *PLoS Pathog.* 2011;7(3):e1002009.
- 912 69. Ramalho R, Rankovic S, Zhou J, Aiken C, Rousso I. Analysis of the mechanical properties of  
913 wild type and hyperstable mutants of the HIV-1 capsid. *Retrovirology.* 2016;13:17.
- 914 70. Francis AC, Marin M, Shi J, Aiken C, Melikyan GB. Time-Resolved Imaging of Single HIV-1  
915 Uncoating In Vitro and in Living Cells. *PLoS Pathog.* 2016;12(6):e1005709.
- 916 71. Shi J, Zhou J, Shah VB, Aiken C, Whitby K. Small-molecule inhibition of human  
917 immunodeficiency virus type 1 infection by virus capsid destabilization. *J Virol.* 2011;85(1):542-  
918 9.
- 919 72. Yang R, Shi J, Byeon IJ, Ahn J, Sheehan JH, Meiler J, et al. Second-site suppressors of HIV-  
920 1 capsid mutations: restoration of intracellular activities without correction of intrinsic capsid  
921 stability defects. *Retrovirology.* 2012;9:30.
- 922 73. Rankovic S, Deshpande A, Harel S, Aiken C, Rousso I. HIV-1 uncoating occurs via a series  
923 of rapid biomechanical changes in the core related to individual stages of reverse transcription.  
924 *bioRxiv.* 2021.
- 925 74. Rankovic S, Ramalho R, Aiken C, Rousso I. PF74 Reinforces the HIV-1 Capsid To Impair  
926 Reverse Transcription-Induced Uncoating. *J Virol.* 2018;92(20).
- 927 75. Christensen DE, Ganser-Pornillos BK, Johnson JS, Pornillos O, Sundquist WI.  
928 Reconstitution and visualization of HIV-1 capsid-dependent replication and integration in vitro.  
929 *Science.* 2020;370(6513).

- 930 76. Francis AC, Marin M, Prellberg MJ, Palermino-Rowland K, Melikyan GB. HIV-1 Uncoating  
931 and Nuclear Import Precede the Completion of Reverse Transcription in Cell Lines and in Primary  
932 Macrophages. *Viruses*. 2020;12(11).
- 933 77. Rensen E, Mueller F, Scoca V, Parmar JJ, Souque P, Zimmer C, et al. Clustering and reverse  
934 transcription of HIV-1 genomes in nuclear niches of macrophages. *EMBO J*. 2021;40(1):e105247.
- 935 78. Sharkey ME, Teo I, Greenough T, Sharova N, Luzuriaga K, Sullivan JL, et al. Persistence of  
936 episomal HIV-1 infection intermediates in patients on highly active anti-retroviral therapy. *Nat*  
937 *Med*. 2000;6(1):76-81.
- 938 79. Butler SL, Hansen MS, Bushman FD. A quantitative assay for HIV DNA integration in vivo.  
939 *Nat Med*. 2001;7(5):631-4.
- 940 80. Kuhn TM, Capelson M. Nuclear Pore Proteins in Regulation of Chromatin State. *Cells*.  
941 2019;8(11).
- 942 81. Dharan A, Talley S, Tripathi A, Mamede JI, Majetschak M, Hope TJ, et al. KIF5B and Nup358  
943 Cooperatively Mediate the Nuclear Import of HIV-1 during Infection. *PLoS Pathog*.  
944 2016;12(6):e1005700.
- 945 82. Price AJ, Fletcher AJ, Schaller T, Elliott T, Lee K, KewalRamani VN, et al. CPSF6 defines a  
946 conserved capsid interface that modulates HIV-1 replication. *PLoS Pathog*. 2012;8(8):e1002896.
- 947 83. Rasheedi S, Shun MC, Serrao E, Sowd GA, Qian J, Hao C, et al. The Cleavage and  
948 Polyadenylation Specificity Factor 6 (CPSF6) Subunit of the Capsid-recruited Pre-messenger RNA  
949 Cleavage Factor I (CFIm) Complex Mediates HIV-1 Integration into Genes. *J Biol Chem*.  
950 2016;291(22):11809-19.

- 951 84. Wanaguru M, Barry DJ, Benton DJ, O'Reilly NJ, Bishop KN. Murine leukemia virus p12  
952 tethers the capsid-containing pre-integration complex to chromatin by binding directly to host  
953 nucleosomes in mitosis. *PLoS Pathog.* 2018;14(6):e1007117.
- 954 85. Miller DG, Adam MA, Miller AD. Gene transfer by retrovirus vectors occurs only in cells  
955 that are actively replicating at the time of infection. *Mol Cell Biol.* 1990;10(8):4239-42.
- 956 86. Zufferey R, Nagy D, Mandel RJ, Naldini L, Trono D. Multiply attenuated lentiviral vector  
957 achieves efficient gene delivery in vivo. *Nat Biotechnol.* 1997;15(9):871-5.
- 958 87. Bainbridge JW, Stephens C, Parsley K, Demaison C, Halfyard A, Thrasher AJ, et al. In vivo  
959 gene transfer to the mouse eye using an HIV-based lentiviral vector; efficient long-term  
960 transduction of corneal endothelium and retinal pigment epithelium. *Gene Ther.*  
961 2001;8(21):1665-8.
- 962 88. Barry DJ, Gerri C, Bell DM, D'Antuono R, Niakan KK. GIANI: open-source software for  
963 automated analysis of 3D microscopy images. *bioRxiv.* 2020.

964

## 965 **FIGURE CAPTIONS**

966

967 **Figure 1. Panel of CA mutants.** (A) The panel of CA mutants used in this study and the lattice  
968 interface at which the mutations reside. New CA mutants with cysteine mutations (E180C,  
969 L151C/L189C and K203C/A217C) were designed based on a previously published cryo-EM MDFF  
970 atomic model (PDB ID: 3J34; Zhao et al, 2013) and crystal structures (PDB ID: 3H4E and 3H47;  
971 Pornillos et al, 2009). The remaining CA mutants were selected from previous publications as  
972 indicated in the references column. (B) Structure of the CA lattice from PDB ID: 3J34, showing 18

973 CA monomers arranged into three hexameric rings. Residues where mutations were made are  
974 highlighted and colour-coded according to the lattice interface type, as in (A).

975

976 **Figure 2. Effect of the CA mutations on viral core stability in cells.** (A, B) Representative  
977 immunoblots of Fate-of-capsid assays comparing WT VLP to mutant VLP. HeLa cells were infected  
978 with equal RT units of WT or mutant VLP and cell lysates were harvested at 2 hpi (A, B) and 20  
979 hpi (A). Cell lysates were centrifuged through a sucrose cushion to separate viral CA into free  
980 (soluble, S) and assembled (pellet, P) fractions. An input (I) sample was also harvested before the  
981 centrifugation through the sucrose cushion. CA was detected by immunoblotting using an anti-  
982 HIV-1 CA antibody. Mutant VLP with a CA ratio of P>S at 2h and P=S at 20h were considered  
983 “hyper-stable” (surrounded with a dashed-line box). Each assay was performed at least three  
984 times independently.

985

986 **Figure 3. Effect of CA mutations on VLP infectivity.** 293T (A), HeLa (B), SupT1 (C) and U937 (D)  
987 cells were infected with equal RT units of GFP-reporter WT or mutant VLP. The percentage of  
988 GFP+ cells was measured by flow cytometry at 72hpi and plotted relative to WT VLP. Points  
989 indicate individual biological repeats and lines show the mean  $\pm$  SEM. Bars are colour coded  
990 according to the lattice interface at which the cysteines have been introduced, as in Fig 1. Hyper-  
991 stable mutants based on the fate of capsid assay are indicated with black arrow heads.

992

993 **Figure 4. Effect of CA mutations on reverse transcription.** 293T cells were synchronously infected  
994 with equivalent RT units of WT or mutant VLP. At the indicated times post-infection, cells were

995 harvested for DNA extraction, and viral cDNA products were measured by qPCR. (A-D) Graphs  
996 show the levels of early (strong stop) cDNA (upper panels) and late (second strand) cDNA (lower  
997 panels) in 293T cells following infection with WT VLP (Black line) and mutants P38A (A),  
998 P207C/T216C (B), A14C/E45C (C) or M68C/E212C (D). The data is shown as mean  $\pm$  SEM from at  
999 least two independent experiments. (E, F) Bar charts show the levels of strong stop cDNA at 6h  
1000 (E) and 24h (F) post infection for the panel of mutants relative to WT infections. (G) Bar chart  
1001 showing the levels of strong stop cDNA at 24 h (left y-axis) and infectivity (from Fig 3) at 72 h  
1002 (right y-axis) compared to WT VLP for each mutant. Individual points represent biological repeats  
1003 and lines indicate the mean  $\pm$  SEM. (H) Bar chart showing the ratio of relative levels of strong  
1004 stop cDNA to infectivity, from (G). Dashed line indicates a ratio of 3. Bars are colour coded  
1005 according to the lattice interface at which the cysteines have been introduced, as in Fig 1. Hyper-  
1006 stable mutants are indicated with a black arrow heads.

1007

1008 **Figure 5. Effect of hyper-stable CA mutations on the early stages of infection.** (A) Disulphide  
1009 cross-linking of CA monomers in cells. HeLa cells were infected with WT VLPs or the hyper-stable  
1010 mutants M68C/E212C, A14C/E45C or E180C, and cell lysates were analysed by non-reducing SDS-  
1011 PAGE and immunoblotting with an HIV-1 CA antibody. Samples were either treated with 10 $\mu$ M-  
1012 50 $\mu$ M (indicated by gradient arrows in first panel) or 50 $\mu$ M (indicated by "+") Iodoacetamide, to  
1013 prevent further disulphide bond formation, or with 0.1M DTT (indicated by "+"), to reduce  
1014 existing disulphide bonds, prior to SDS-PAGE. The prominent bands at 24 and 48 kDa correspond  
1015 to monomeric and dimeric CA, respectively. (B) 293T cells were synchronously infected with  
1016 equivalent RT units of WT or mutant VLP. At the indicated times post-infection, cells were



1017 harvested for DNA extraction, and early and late cDNA (6hpi), 2-LTR circles (24hpi) and integrated  
1018 proviral DNA (2 weeks post infection) were measured by qPCR. Data were plotted relative to WT  
1019 infections (shown as a dashed line at 100%). Points indicate individual biological repeats and lines  
1020 show the mean  $\pm$  SEM. Viral infectivity from parallel infections (see Fig 3) was plotted for  
1021 comparison.

1022

1023 **Figure 6. Cellular localisation of CA and IN proteins during WT and A14C/E45C infections.** HeLa  
1024 cells were synchronously infected with equal RT units of WT or A14C/E45C mutant (CC in the  
1025 figure) VLP. At 4, 8, 24 and 30 h post-infection, cells were harvested in parallel to be processed  
1026 as a whole cell lysate or to undergo subcellular fractionation. Protein levels were quantified by  
1027 BCA assay, proportional amounts of the fractions related to the WCL were loaded on SDS-PAGE  
1028 gels and analysed by immunoblotting using the following antibodies: Anti-CA and anti-IN for HIV-  
1029 1 proteins, HSP90 for cytoplasm, Calnexin for membranes, HDAC2 for nucleus, Histone 3 for  
1030 chromatin and Tubulin  $\alpha$  for cytoskeleton. Lamin B1 was used as a nuclear envelope marker. “-“  
1031 indicates uninfected cells. Panels show representative immunoblots of: (A) WCL probed for HIV-  
1032 1 CA and IN. HSP90 was blotted as a loading control. (B) Subcellular fractions from uninfected  
1033 cells, probed for control proteins to confirm successful sample fractionation. (C-E) Subcellular  
1034 fractions probed for HIV-1 CA and IN and the appropriate cellular marker: (C) cytoplasm, (D)  
1035 membranes, (E) nucleus and (F) chromatin fraction.

1036

1037 **Figure 7. CA co-localisation of CA with Nup358 and Nup153 during infection.** HeLa cells were  
1038 synchronously infected with equal RT units of WT or A14C/E45C VLP and fixed at 2, 4, 6, 8 and 10

1039 hpi. Cells were incubated with primary antibodies to HIV-1 CA and either Nup358 (A-C) or Nup153  
1040 (D-F), followed by specific secondary antibodies conjugated to the PLUS and MINUS PLA  
1041 oligonucleotides (probes). Each foci represents a positive PLA signal generated by the amplification  
1042 of the interaction between the PLUS and MINUS probes. (A) and (D) show representative images  
1043 of CA-Nup358 and CA-Nup153 co-localisation at 8 hpi, respectively (the scale bar is 10 $\mu$ m).  
1044 Longitudinal Z-series were acquired with a 63X objective using a confocal microscope followed  
1045 by 3D image analysis performed with the GIANI plug-in in FIJI. The number of foci per cell (B and  
1046 E) and the distance of those foci to the DAPI edge (C and F) were quantified. In the plots, each  
1047 point represents the mean foci data from all the cells within an image (75 to 100 cells/image). At  
1048 least 12 images were acquired per condition over at least three independent biological repeats  
1049 (plotted in different colours). Overall means  $\pm$  SEM are shown in black. \* $p$ <0.05, \*\* $p$ <0.01,  
1050 \*\*\* $p$ <0.001, \*\*\*\* $p$ <0.0001, ns = not significant.

1051

1052 **Figure 8. HIV-1 CA, CPSF6 and SC35 staining during infection with WT and hyper-stable mutant**  
1053 **VLP.** HeLa cells were synchronously infected with equal RT units of WT, A14C/E45C, E180C or  
1054 M68C/E212C VLP and fixed at 16hpi. Cells were incubated with primary antibodies against HIV-1  
1055 CA, CPSF6 and SC35 followed by specific secondary antibodies conjugated to Alexa Fluor  
1056 fluorophores. (A) Representative images of SC35 and CPSF6 staining. White arrows point to SC35  
1057 and CPSF6 co-localisation in the merged WT image. (B) Representative images of HIV-1 CA and  
1058 CPSF6 staining (left panels). White boxes in WT columns indicate zoomed-in regions labelled 1  
1059 and 2 (right panels). The scale bar in (A) and (B) represents 10 $\mu$ m. Bar chart shows the number  
1060 of CA positive cells that showed CPSF6 redistribution to puncta. Points indicate individual

1061 biological repeats (~150 cells per experiment were used for quantification) and lines show the  
1062 mean  $\pm$  SEM; \*\*\*\*p<0.0001.

1063

1064 **Figure 9. Current models for HIV-1 and MLV uncoating.** Incoming viral cores (HIV-1, left columns  
1065 and MLV, right column) surrounded by a CA lattice (orange hexamers) contain the viral RNA (red)  
1066 coated with nucleocapsid (light blue), as well as the viral enzymes, protease (yellow), reverse  
1067 transcriptase (light green) and integrase (purple) (step 1). Reverse transcription of the RNA to  
1068 double stranded DNA (dark blue) starts following infection and the core travels towards the  
1069 nucleus down microtubules (step 2). HIV-1 DNA can cross the nuclear pore (step 3), and in  
1070 association with CPSF6 (green dots) (step 4), move to nuclear speckles (darker pink shaded  
1071 regions) and integrate into the host cell chromatin (grey with orange ovals) (step 5) to form a  
1072 provirus (step 6). When and where the CA lattice disassembles and where reverse transcription  
1073 finishes is still debated and the possible scenarios for HIV-1 uncoating (loss of orange hexagons)  
1074 are illustrated here: from left to right; uncoating in the cytoplasm, uncoating at the nuclear pore,  
1075 uncoating inside the nucleus or uncoating at the site of integration. In contrast, MLV cannot pass  
1076 through nuclear pores and must wait for mitosis to occur before accessing the chromatin. Our  
1077 current model for MLV uncoating is shown on the right: At mitosis, the N-terminal domain of the  
1078 MLV p12 protein (red) binds directly to CA and the C-terminal domain (green) binds to  
1079 nucleosomes, tethering the likely intact MLV core to the host chromatin. Following mitosis, MLV  
1080 uncoats to allow integration, which, as it is already associated with chromatin, probably occurs  
1081 at the integration site.

1082

1083 **SUPPORTING INFORMATION**

1084

1085 **Supplementary table 1. Primers used to make CA mutations by site-directed mutagenesis.**

1086 Table listing forward and reverse primers used to introduce cysteine mutations on CA by site-  
1087 directed mutagenesis.

1088

1089 **Supplementary figure 1. VLP production and Gag expression.** (A) GFP-reporter gene-expressing

1090 HIV-1 WT and mutant VLP were produced by transient transfection of 293T cells and the VLP

1091 titres in the cell supernatants were calculated by measuring RT activity using a modified RT ELISA.

1092 The bar chart shows the RT activity of the mutants relative to WT. Points indicate individual

1093 biological repeats and lines show the mean  $\pm$  SEM. Colour coding is as in Fig 1. (B) Immunoblot

1094 of transfected 293T producer cell lysates probed with an anti-HIV-CA antibody showing

1095 expression of WT and mutant Gag proteins from CA mutants A14C/E45C, W184A/M185A and

1096 A14C/E45C/W184A/M185A. The blot was imaged using a LiCor Odyssey CLx imager. (C)

1097 Immunoblot of transfected 293T producer cell lysates probed with anti-HIV-CA antibody showing

1098 expression of WT and mutant Gag proteins from CA mutants A42C/T54C, Q63C/Y169C, E180C,

1099 V181C, L151C/L169C and K203C/A217C. The blot was imaged by exposure to X-ray film.

1100

1101 **Supplementary figure 2. Effect of CA mutations on late reverse transcription.** 293T cells were

1102 synchronously infected with equivalent RT units of WT or mutant VLP. Cells were harvested and

1103 DNA extracted and analysed for viral late cDNA products (second strand) by qPCR. (A) Bar chart

1104 shows the levels of second strand cDNA at 6 h post infection relative to WT infection. (B) Bar

1105 chart shows the levels of second strand cDNA at 24 h (left y-axis) and infectivity at 72 h (right y-  
1106 axis) compared to WT VLP for each mutant. Individual points represent biological repeats and  
1107 lines indicate the mean +/- SEM. (H) Bar chart shows the ratio of relative levels of second strand  
1108 cDNA to infectivity, from (B). Dashed line indicates a ratio of 3. Bars are colour coded according  
1109 to the lattice interface at which the cysteines have been introduced, as in fig 1. Hyper-stable  
1110 mutants are indicated with black arrow heads.

1111

1112 **Supplementary figure 3. CPSF6 and SC35 staining during infection.** HeLa cells were  
1113 synchronously infected with equal RT units of WT, A14C/E45C, E180C or M68C/E212C VLP and  
1114 fixed at 16hpi. Cells were incubated with primary antibodies against CPSF6 and SC35 followed by  
1115 specific secondary antibodies conjugated to Alexa Fluor fluorophores. The figure shows  
1116 representative images of CPSF6 and SC35 staining at a lower magnification (63X) than in Fig 8A.  
1117 The scale bar represents 20  $\mu\text{m}$ .



A

| LATTICE INTERFACE                           |                                    | CA MUTATION                   | REFERENCES                                                   |
|---------------------------------------------|------------------------------------|-------------------------------|--------------------------------------------------------------|
| INTRA-<br>HEXAMER                           | NTD                                | P38A                          | Forshey <i>et al</i> , 2002; Cosnefroy <i>et al</i> , 2016   |
|                                             | NTD-NTD                            | A14C/E45C                     | Pornillos <i>et al</i> , 2009; Pornillos <i>et al</i> , 2010 |
|                                             |                                    | A42C/T54C                     | Pornillos <i>et al</i> , 2010; Yeager, 2011                  |
|                                             | NTD-CTD                            | M68C/E212C                    | Yufenyuy & Aiken, 2013                                       |
|                                             |                                    | Q63C/Y169C                    | Yufenyuy & Aiken, 2013                                       |
| INTER-<br>HEXAMER                           | DIMERIC<br>CTD-CTD                 | E180C                         | New CA mutant                                                |
|                                             |                                    | L151C/L189C                   | New CA mutant                                                |
|                                             | TRIMERIC<br>CTD-CTD                | A204C                         | Zhao <i>et al</i> , 2013; Ramalho <i>et al</i> , 2016        |
|                                             |                                    | P207C/T216C                   | Byeon <i>et al</i> , 2009; Zhao <i>et al</i> , 2011          |
|                                             |                                    | K203C/A217C                   | New CA mutant                                                |
| INTRA-<br>HEXAMER<br>+<br>INTER-<br>HEXAMER | NTD-NTD<br>+<br>DIMERIC<br>CTD-CTD | A14C/E45C<br>+<br>W184A/M185A | Pornillos <i>et al</i> , 2009; Pornillos <i>et al</i> , 2010 |

bioRxiv preprint doi: <https://doi.org/10.1101/2021.03.18.436099>; this version posted March 18, 2021. The copyright holder for this preprint (which was not certified by peer review) is the author/funder, who has granted bioRxiv a license to display the preprint in perpetuity. It is made available under aCC-BY 4.0 International license.

B

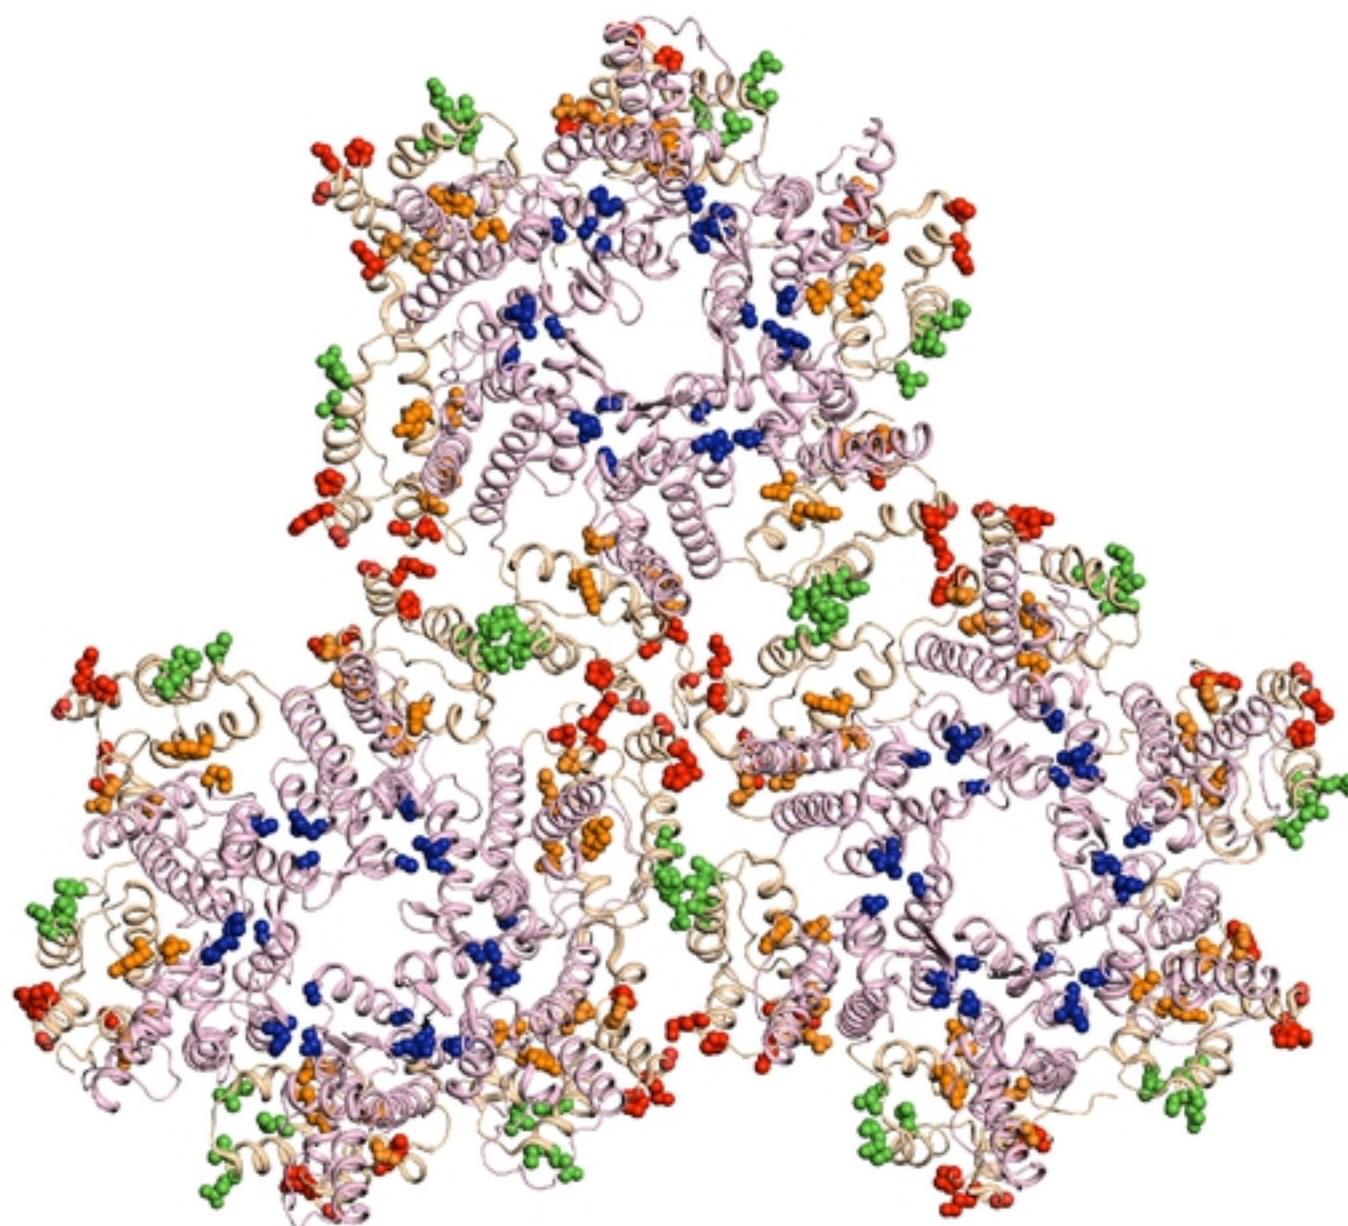

A

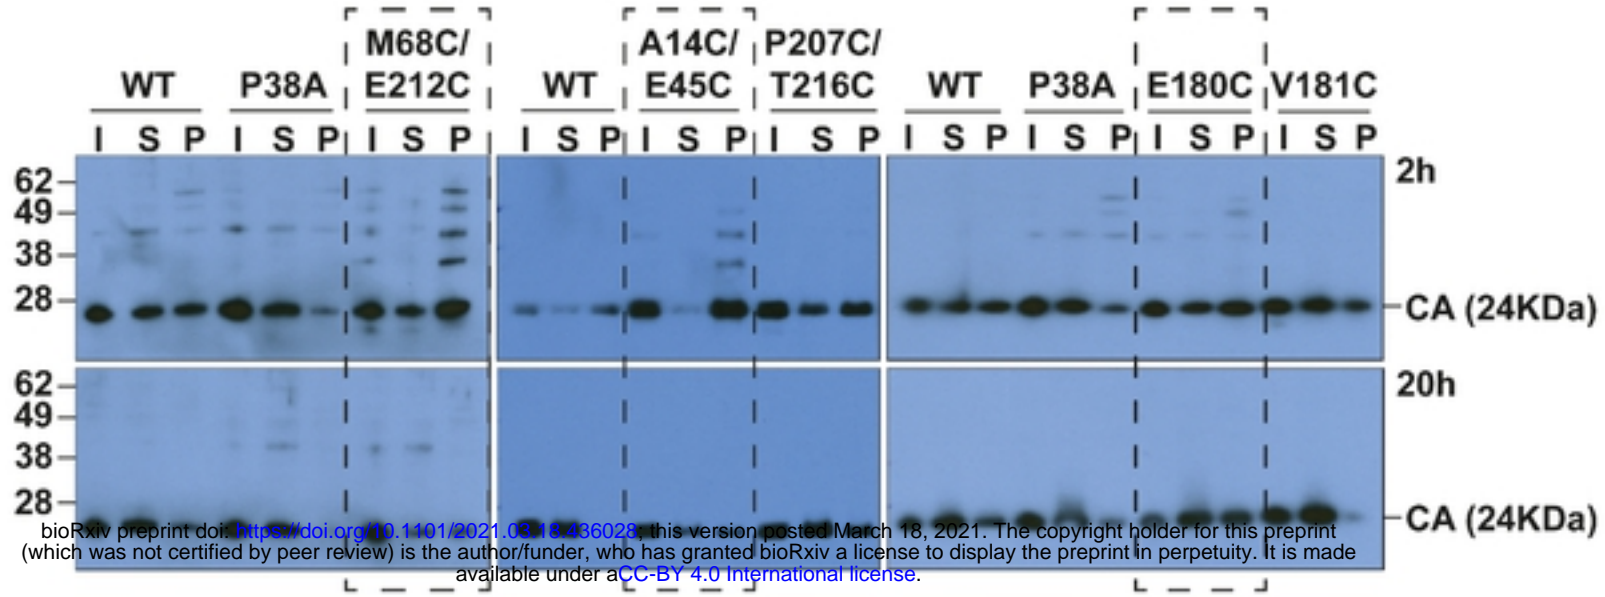

B

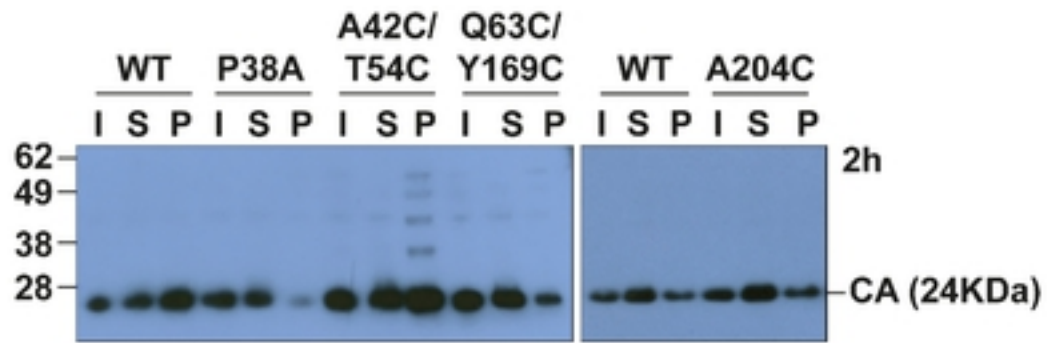

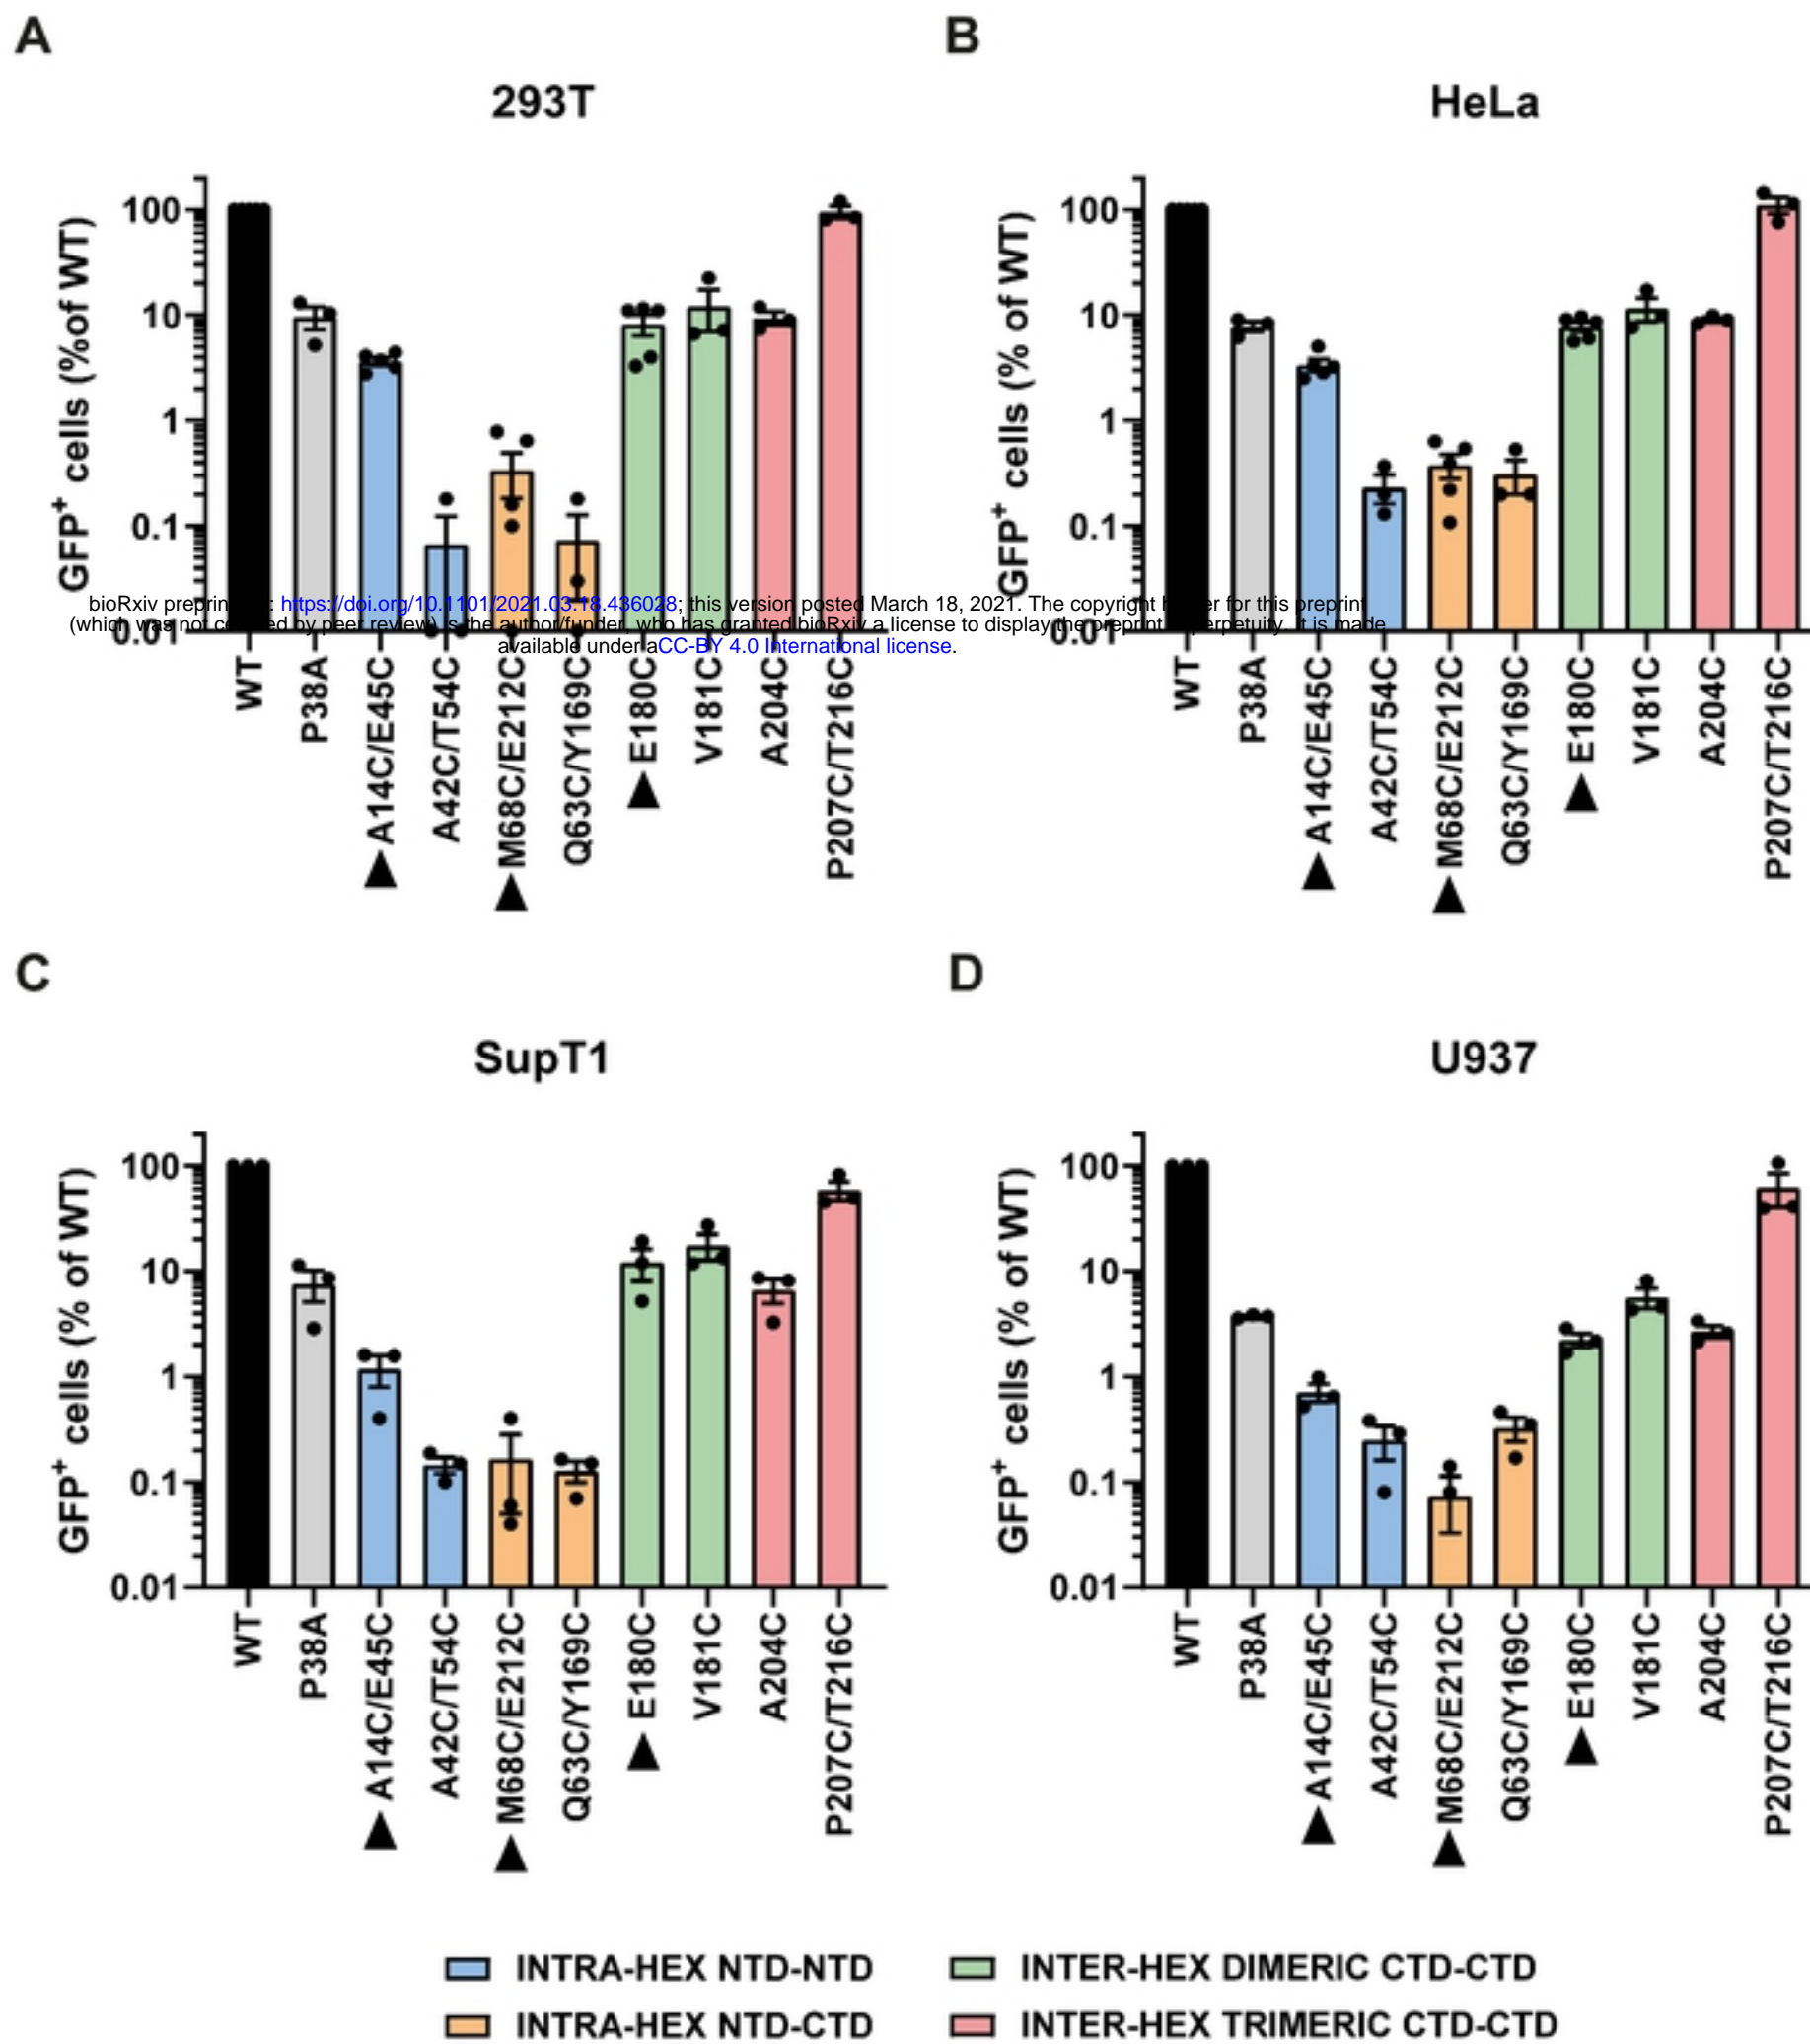



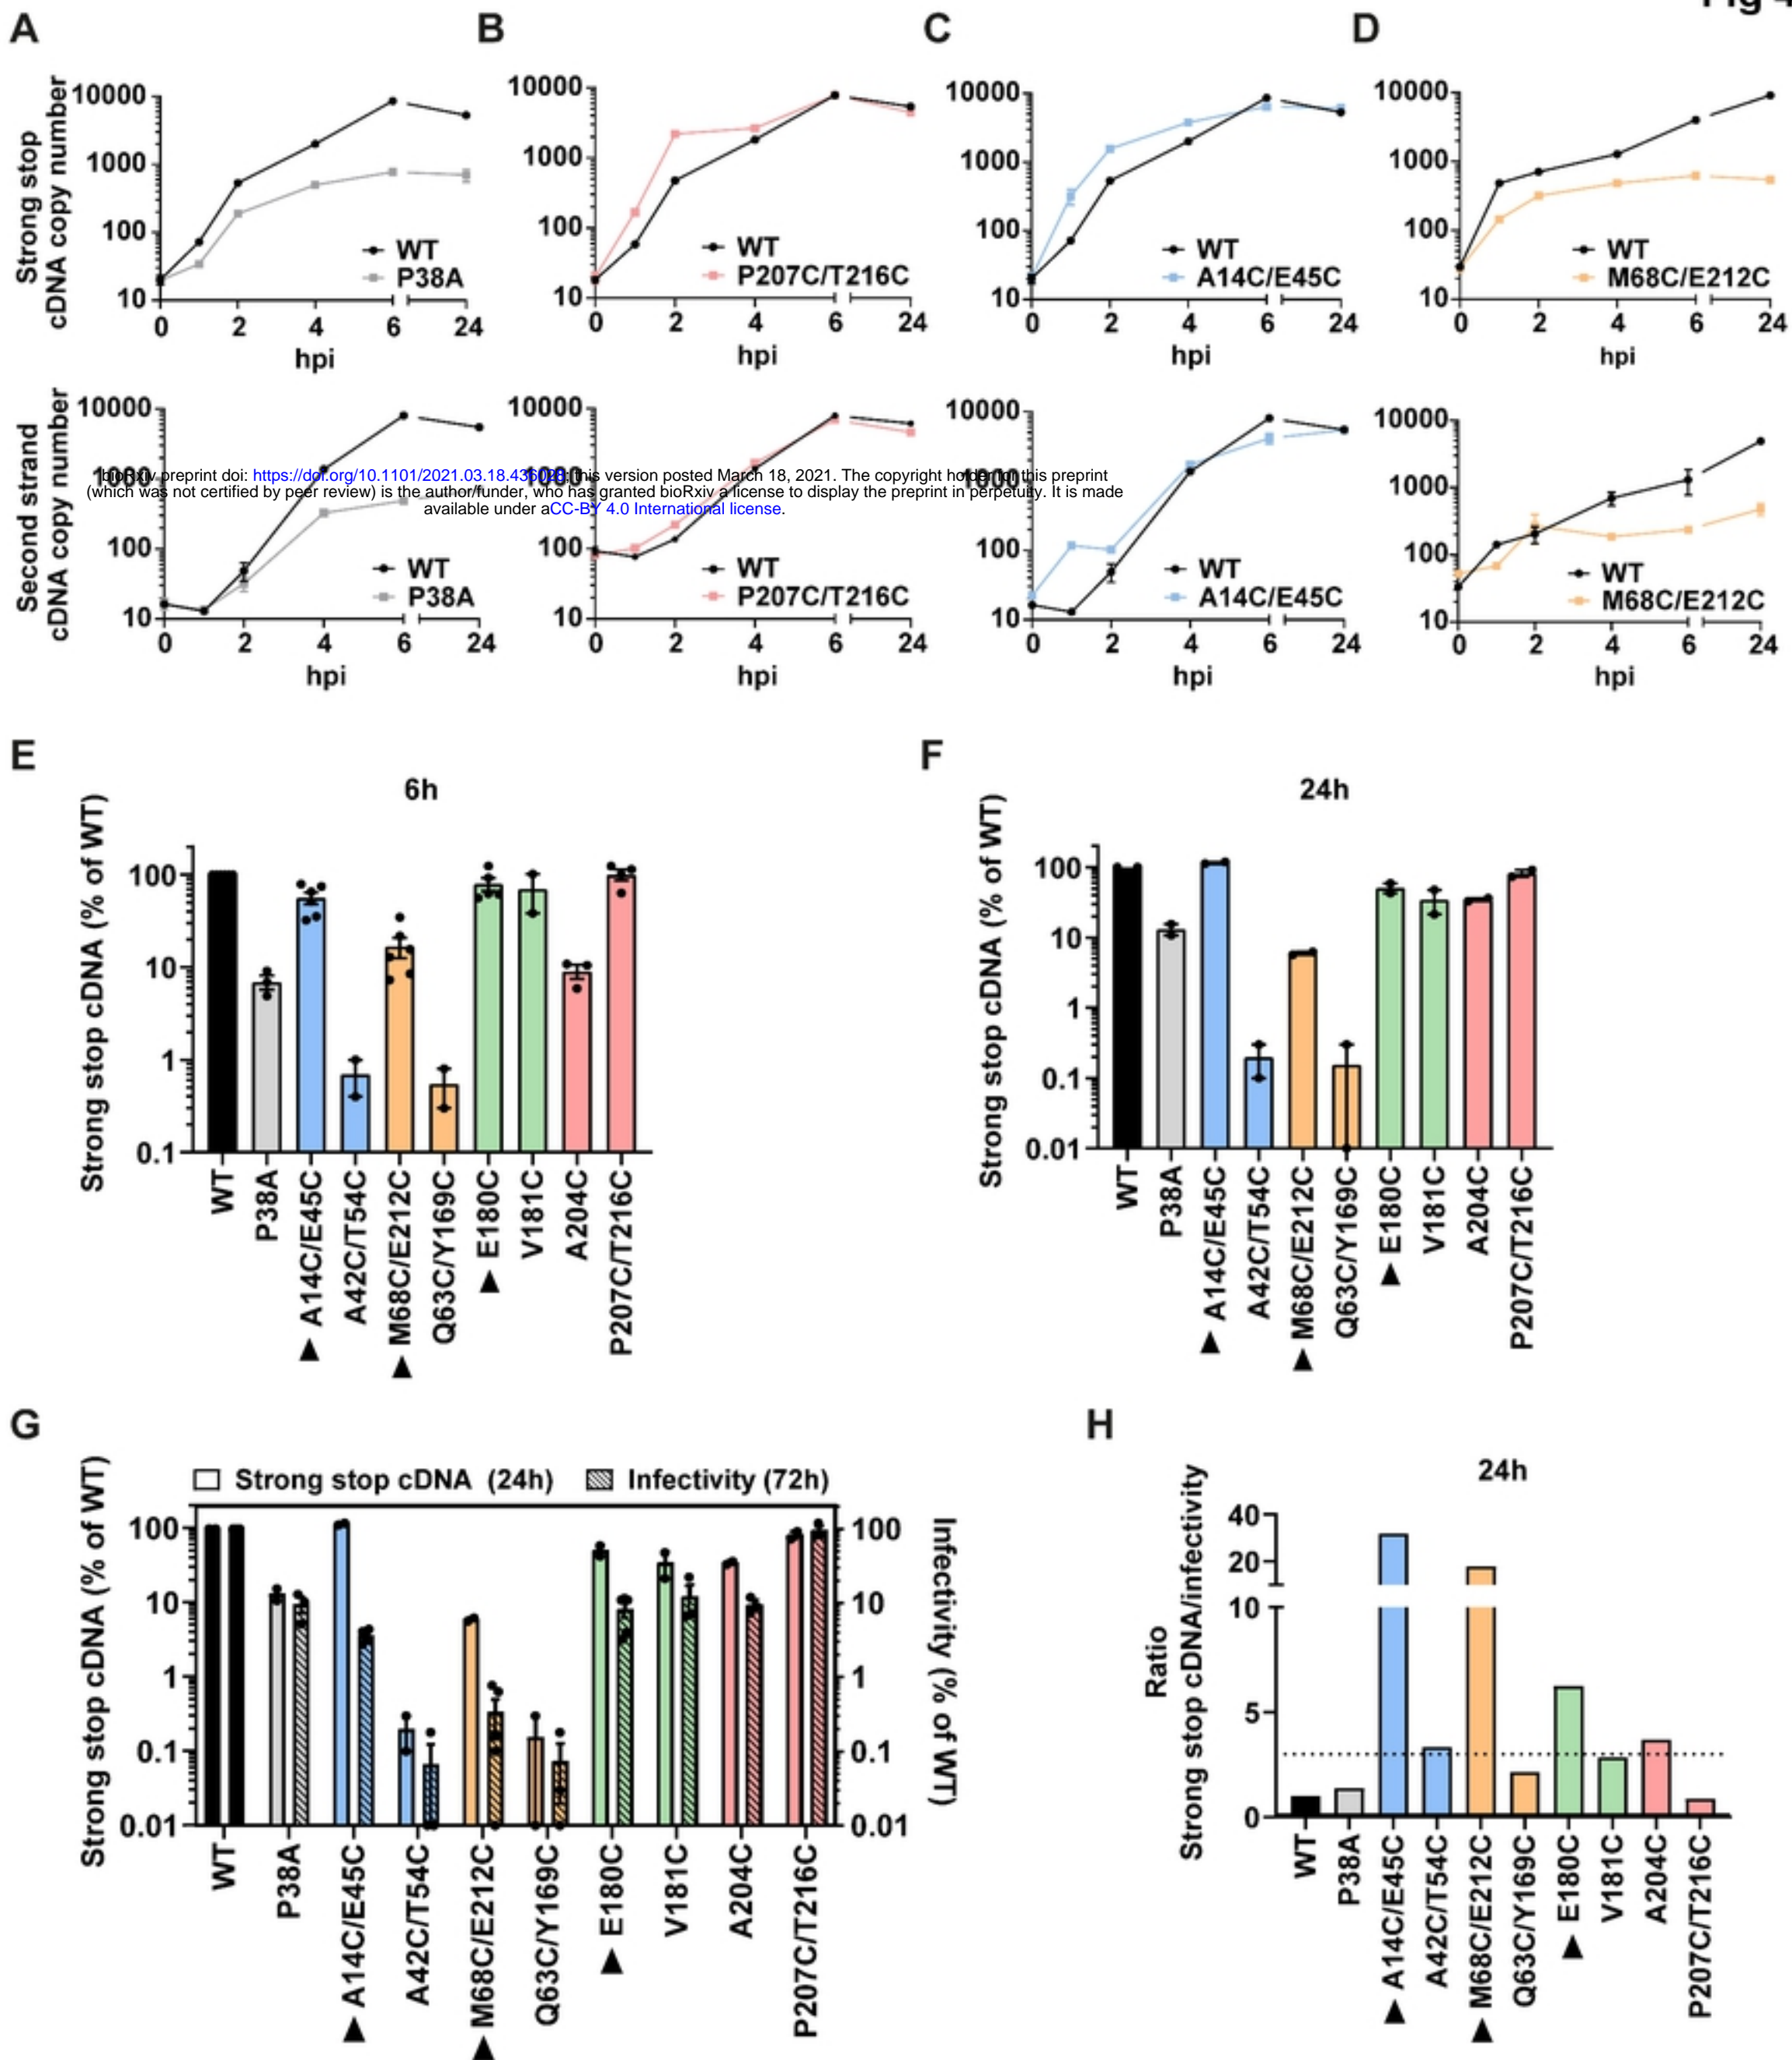

A

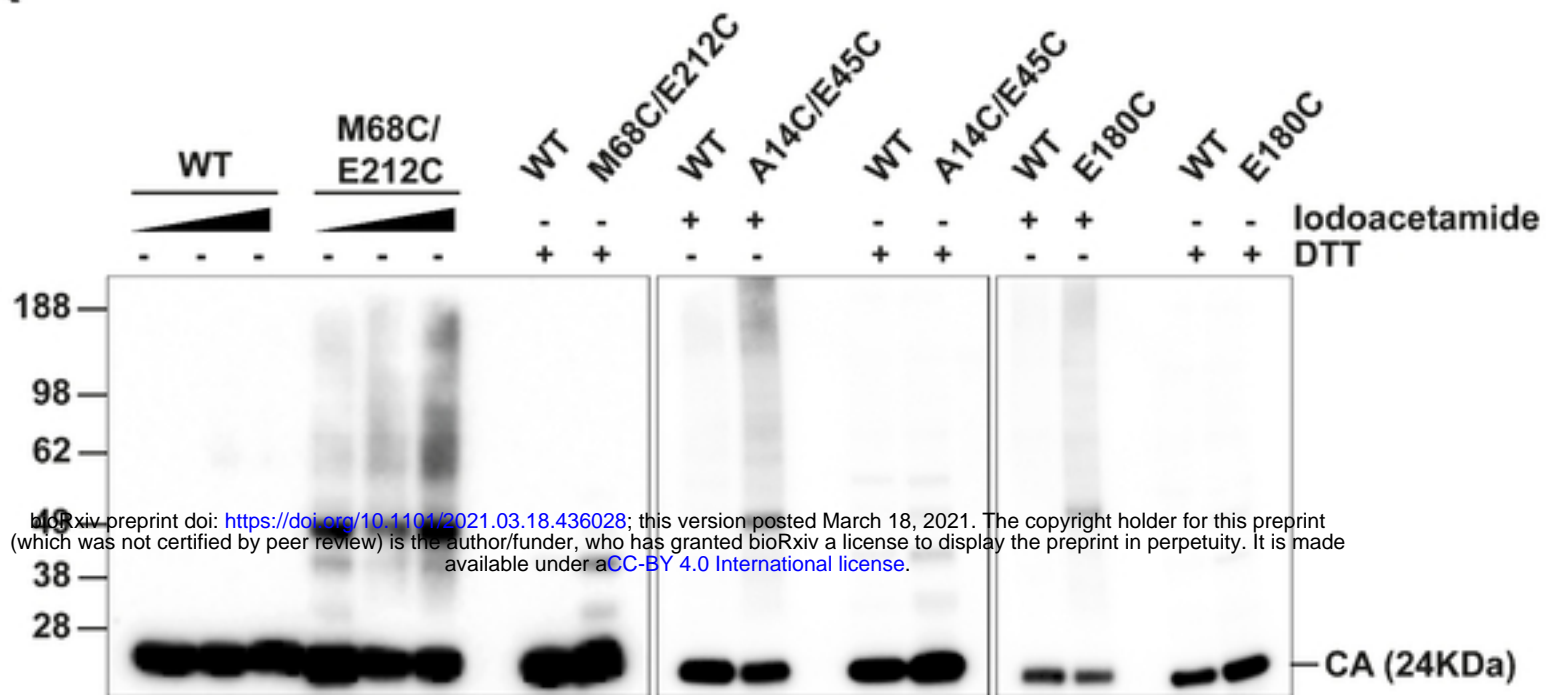

B

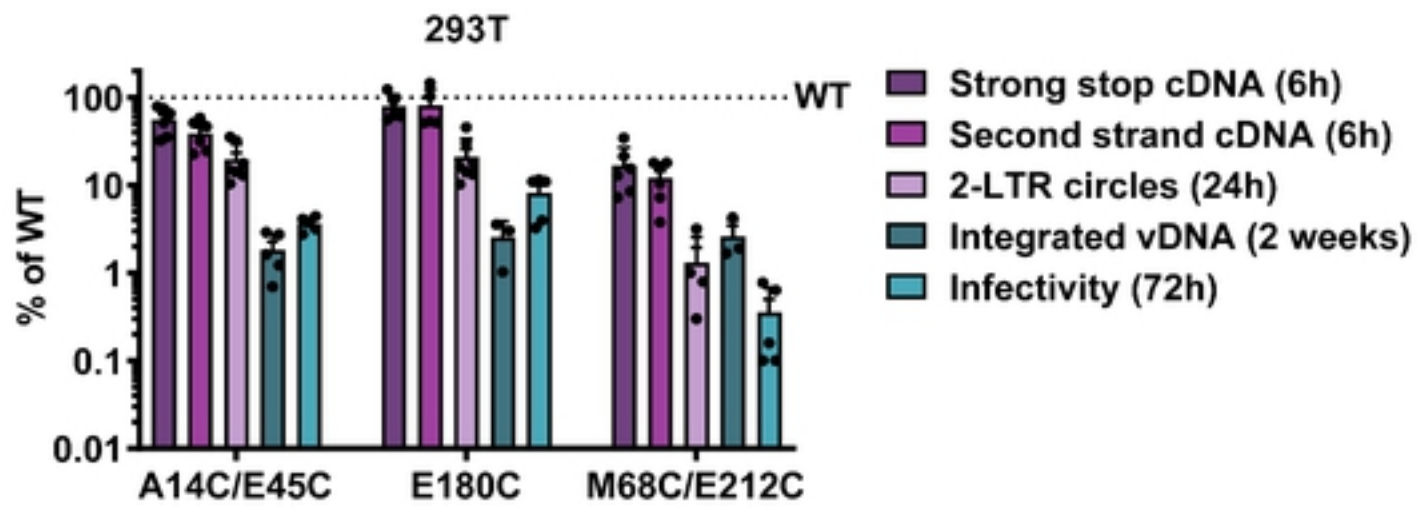

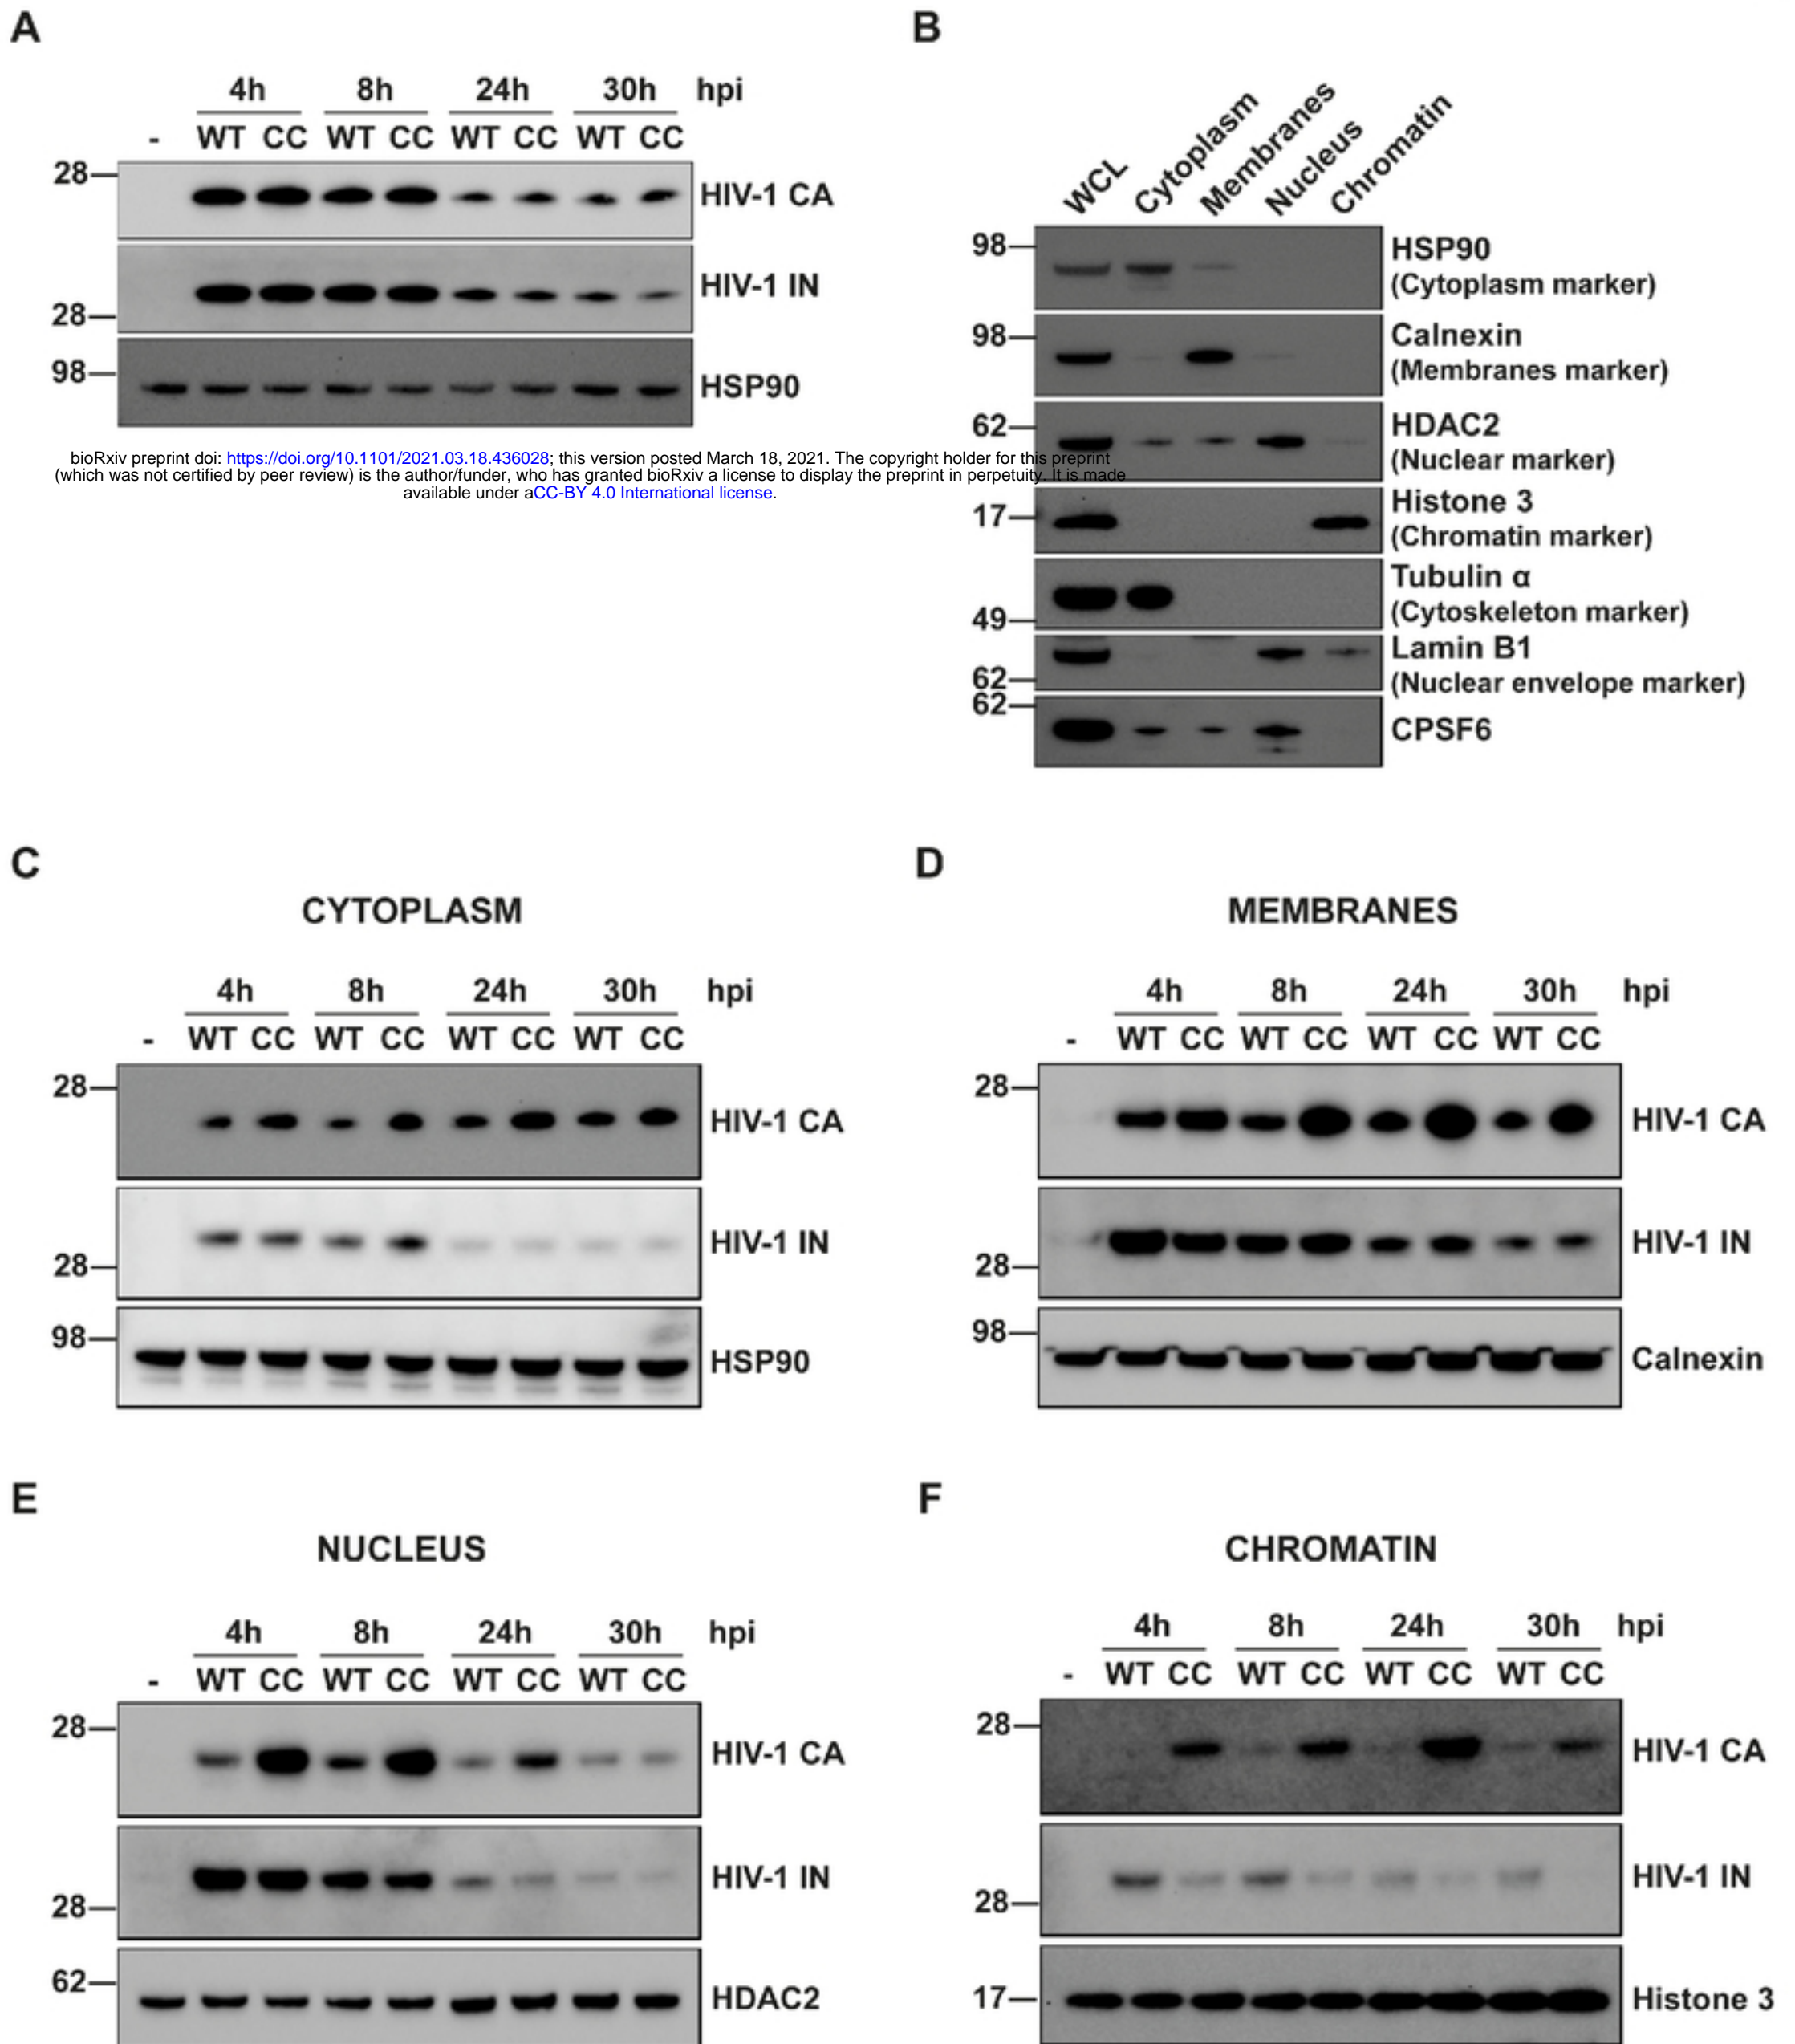



A

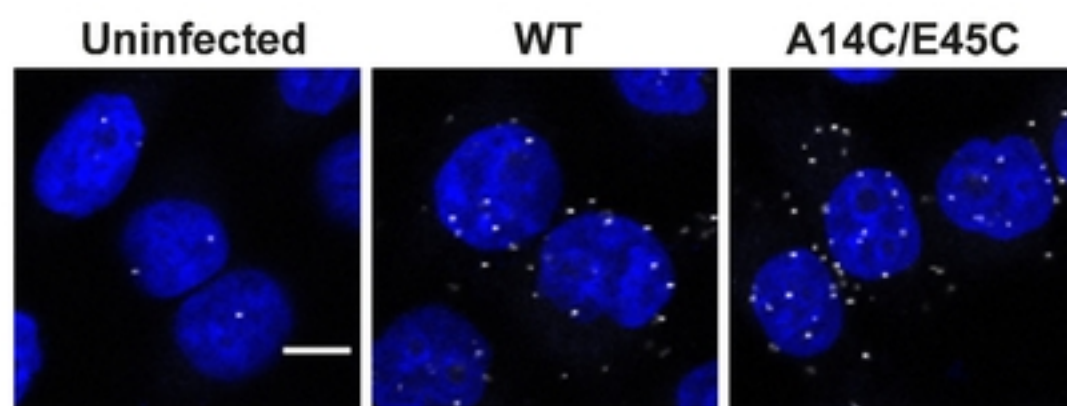

B

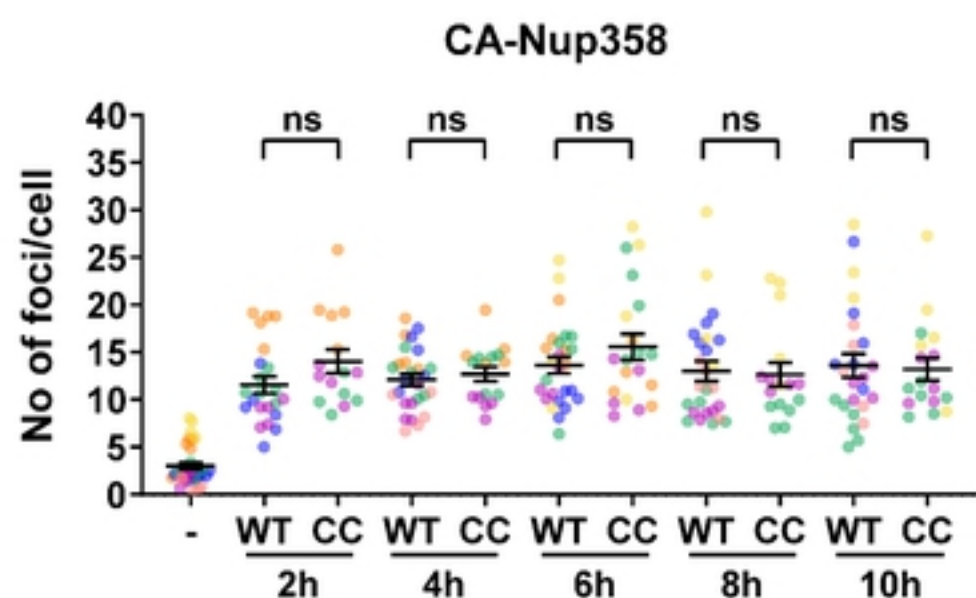

C

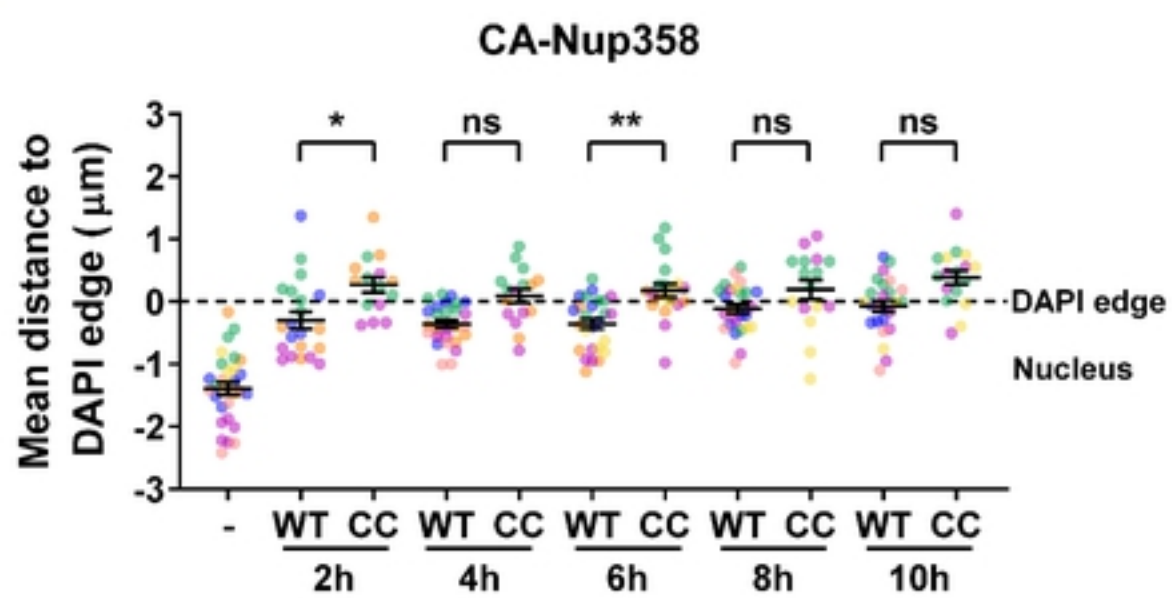

D

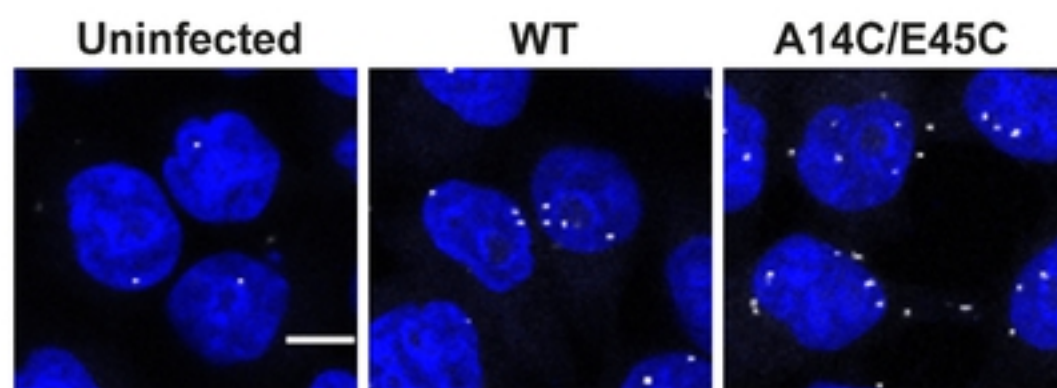

E

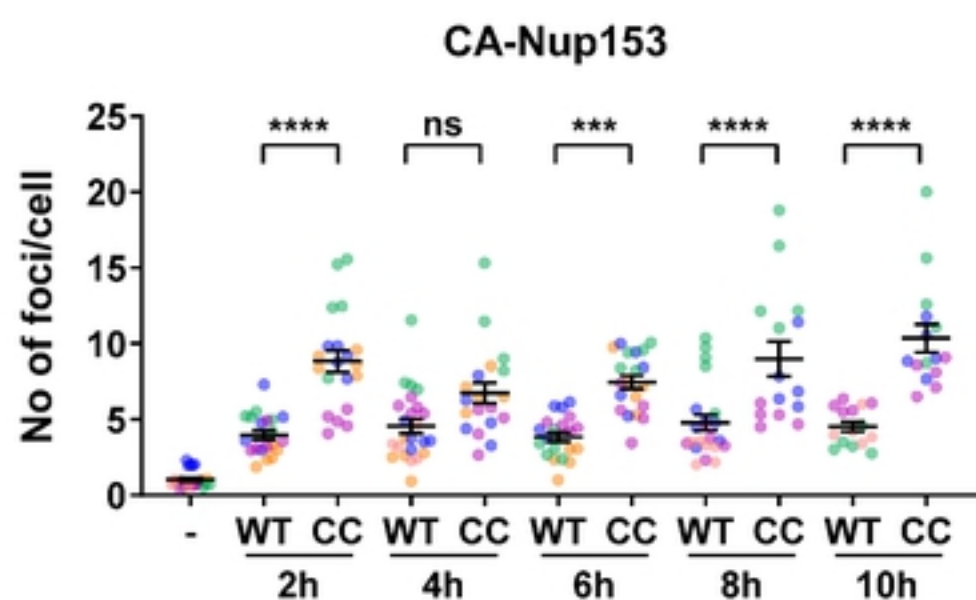

F

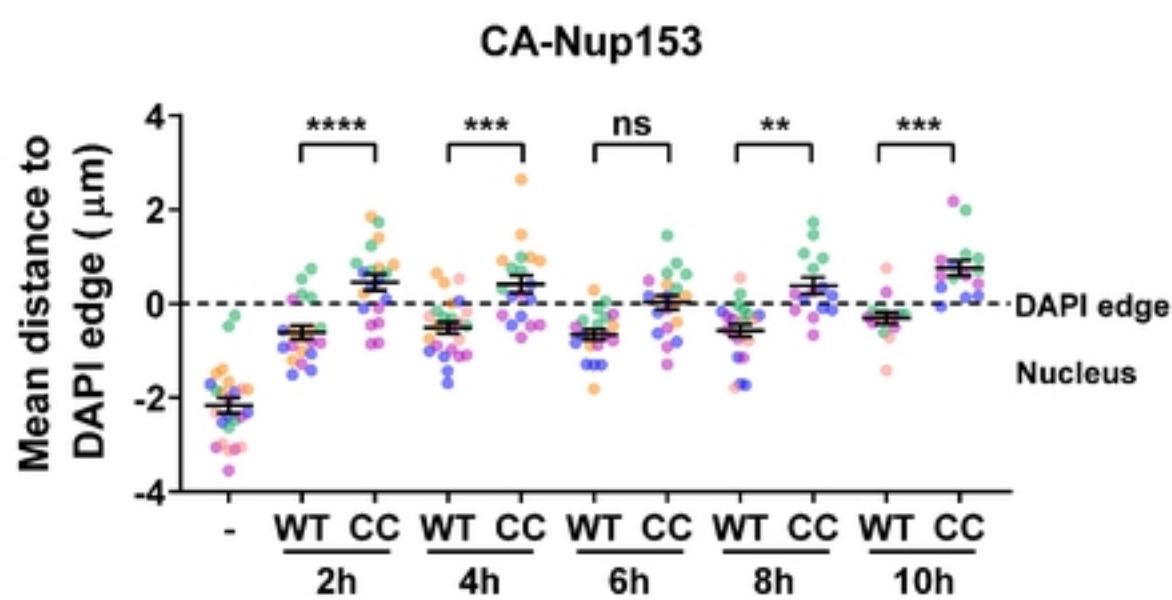





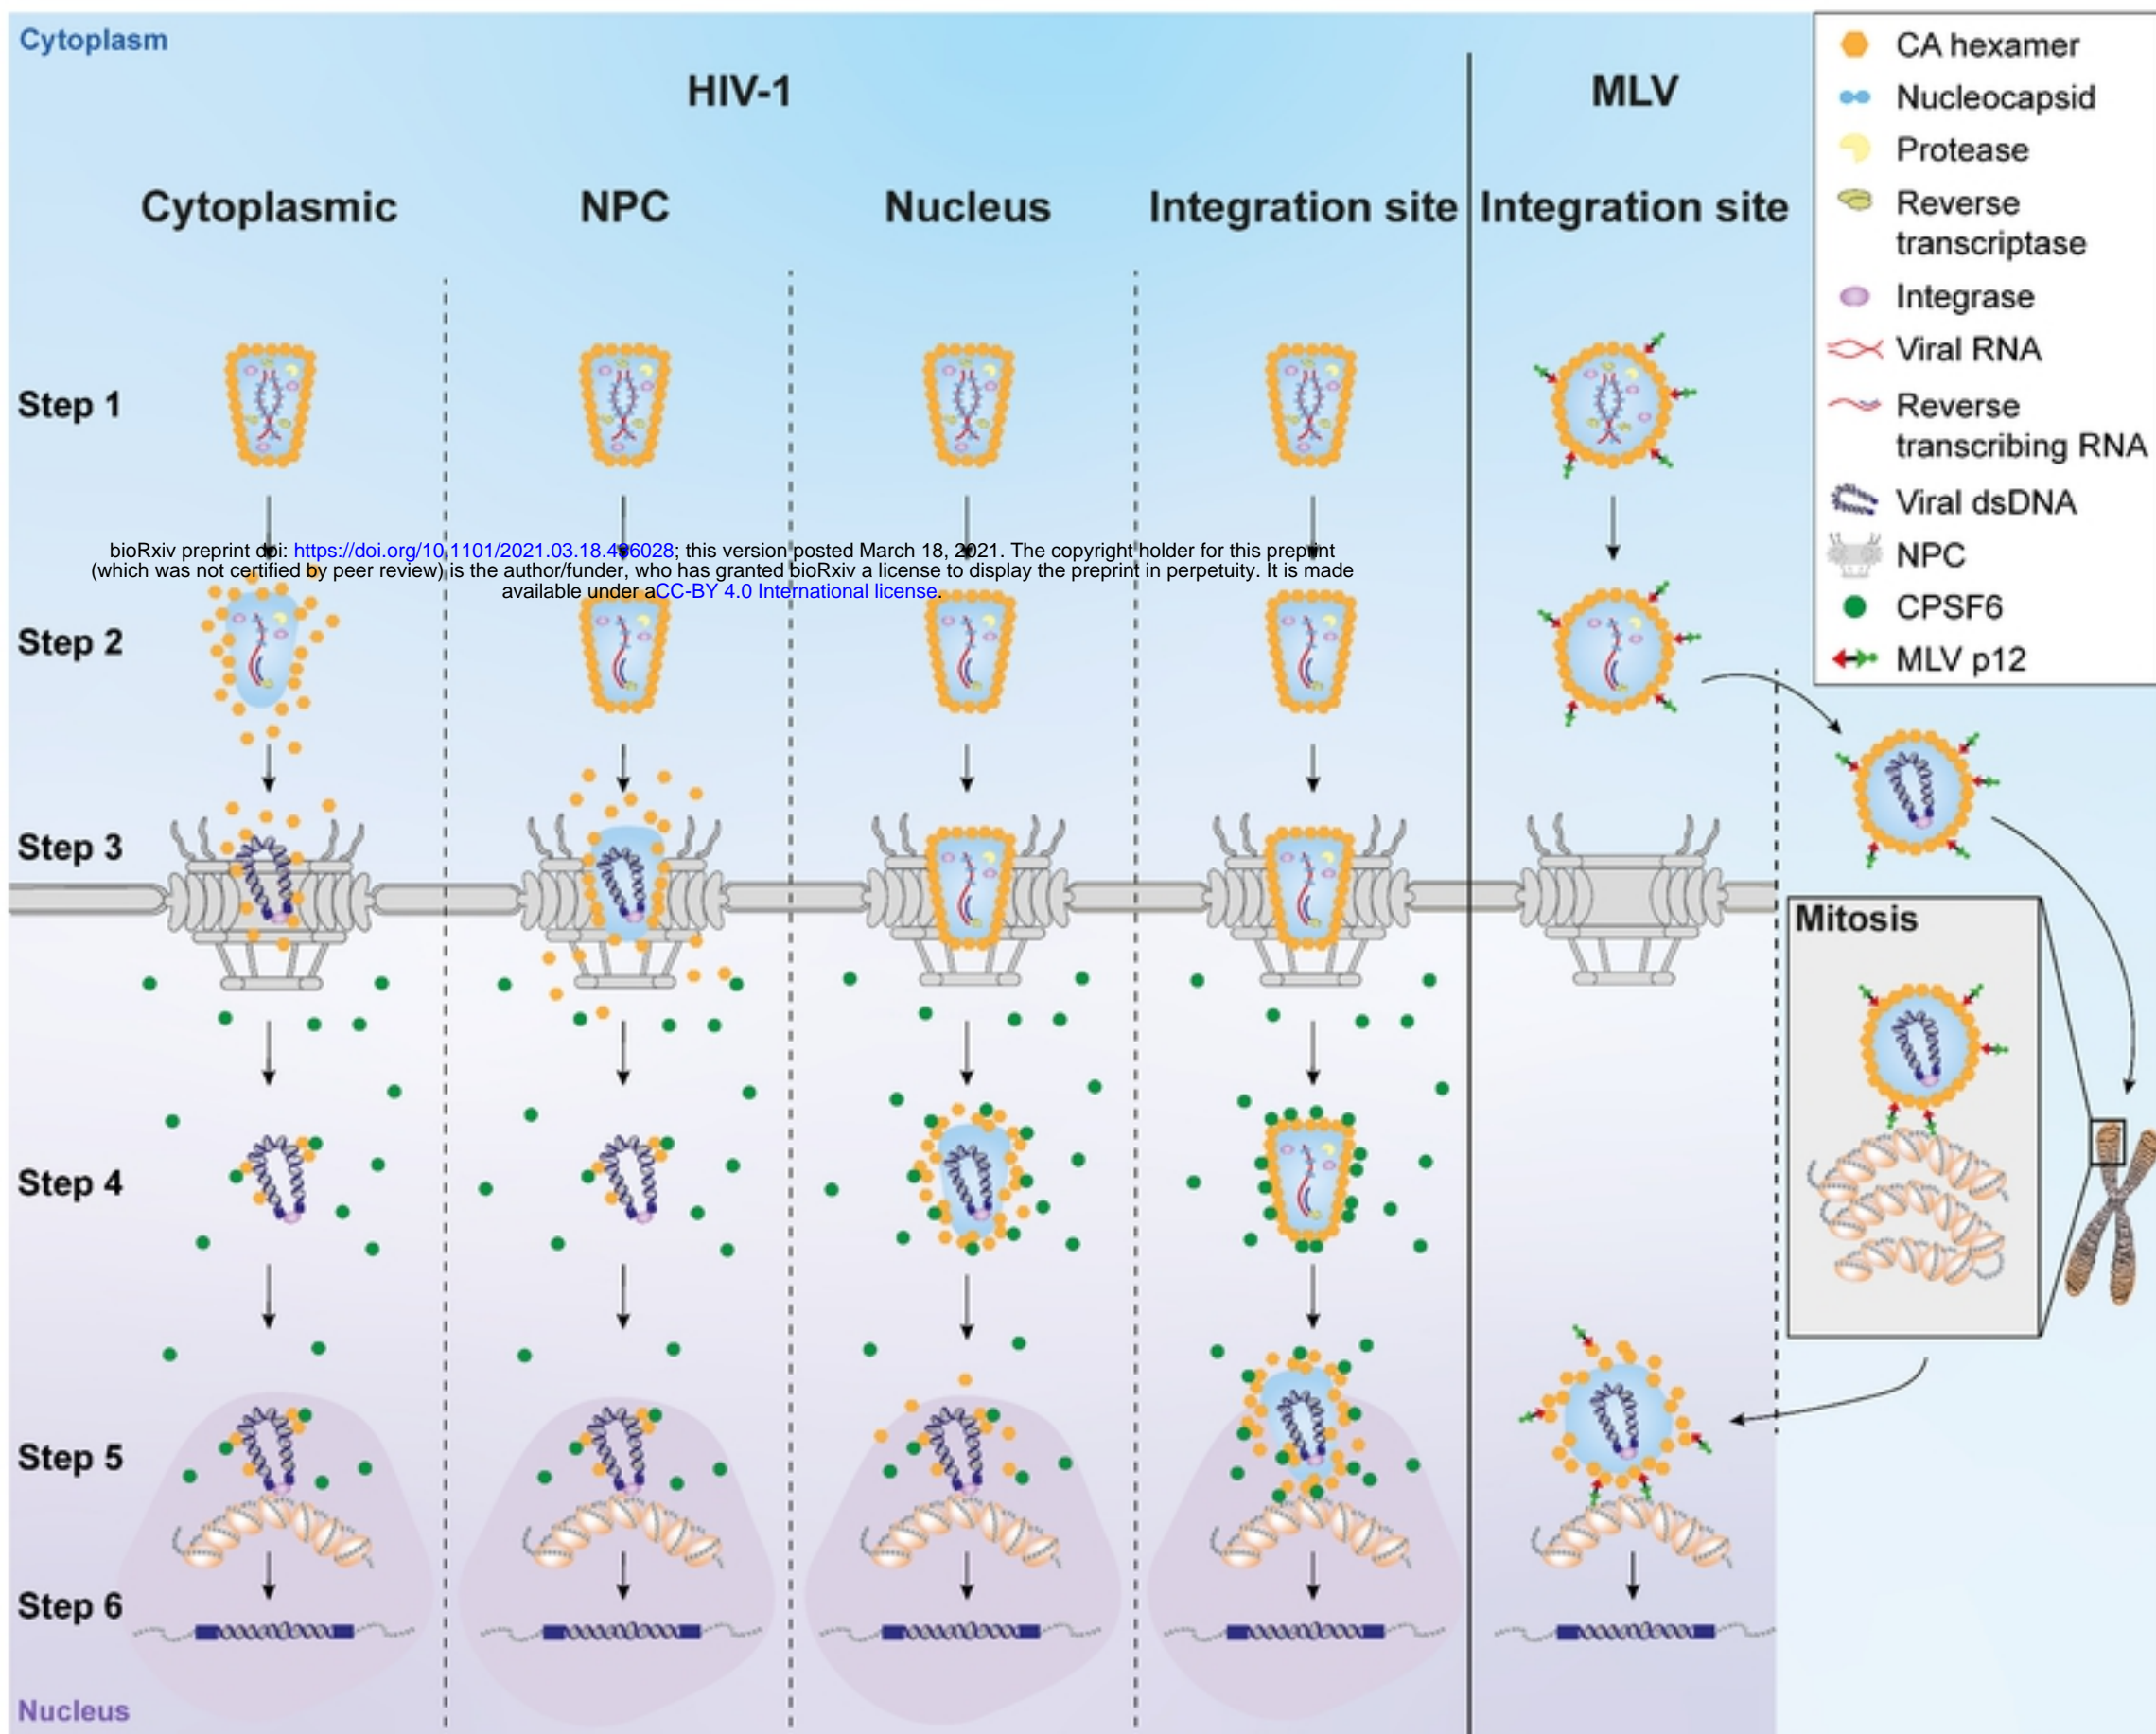

Source: https://www.biorxiv.org/content/10.1101/2021.03.18.436028v1.full.pdf
